# Supplementary material for: Time series clustering of mRNA and lncRNA expression during osteogenic differentiation of periodontal ligament stem cells
Source: PeerJ. 2018 Jul 16;6:e5214. doi: 10.7717/peerj.5214 (PMC6052852; doi:10.7717/peerj.5214)
Supplement: Supplemental Information 4 [file peerj-06-5214-s004.xlsx]

## Sheet: D3 vs D0
AccID	type_of_gene	Log2FC
BCYRN1	ncRNA	1.1113
LOC101927561	ncRNA	-1.82846
LOC100131315	ncRNA	-2.02976
LOC100130938	ncRNA	-1.486
UNC5B-AS1	ncRNA	-3.53895
LOC102723587	ncRNA	-1.66671
LOC101929291	ncRNA	1.29599
FCRL6P1	ncRNA	-3.01288
SNHG5	ncRNA	-1.145
LOC101929309	ncRNA	20
EPB41L4A-AS1	ncRNA	-1.36408
LOC101929296	ncRNA	-1.08841
TMEM75	ncRNA	-1.12867
LOC102723666	ncRNA	1.89749
FRMD6-AS1	ncRNA	-1.36207
LOC100499194	ncRNA	1.16149
LOC102723972	ncRNA	20
LOC102723797	ncRNA	-1.38319
LOC102723500	ncRNA	3.43833
HCP5	ncRNA	1.72882
LOC101928860	ncRNA	-1.47482
LOC101928875	ncRNA	20
LINC00312	ncRNA	1.22094
ZNF674-AS1	ncRNA	-1.29027
LOC101928188	ncRNA	-1.98762
LOC101928419	ncRNA	-4.47755
MIR503HG	ncRNA	-3.17638
LINC00662	ncRNA	-1.12391
RGMB-AS1	ncRNA	-2.29048
LOC101928352	ncRNA	-1.05587
LOC101927119	ncRNA	1.71844
LOC102724554	ncRNA	1.51896
LOC102723458	ncRNA	4.04601
NEAT1	ncRNA	1.35454
LOC102723927	ncRNA	2.70898
STARD13-AS	ncRNA	-1.0295
LOC102723341	ncRNA	2.36794
LINC00856	ncRNA	-2.89995
LOC100507165	ncRNA	1.95938
GAS5	ncRNA	-1.39373
LOC102724252	ncRNA	-2.42111
NTM-IT	ncRNA	-20
KIRREL3-AS2	ncRNA	-1.2808
LOC102724869	ncRNA	-1.95399
LINC00900	ncRNA	-1.72337
LOC389641	ncRNA	2.53144
LOC102723766	ncRNA	-4.04145
LOC102724467	ncRNA	-20
SOCS2-AS1	ncRNA	-2.31964
LINC00909	ncRNA	-1.07357
C1orf220	ncRNA	-2.3608
C1orf140	ncRNA	-3.12391
RNF144A-AS1	ncRNA	3.16149
RP11-540D4.3	ncRNA	20
MBNL1-AS1	ncRNA	1.06571
LOC102724854	ncRNA	-2.79271
SEPT5-GP1BB	ncRNA	1.70141
FRY-AS1	ncRNA	2.20521
LOC101929398	ncRNA	-1.32322
LOC100505504	ncRNA	1.25361
FAM212B-AS1	ncRNA	-2.58334
LOC100506860	ncRNA	-1.40939
C20orf166-AS1	ncRNA	2.9529
LOC101929690	ncRNA	-1.17638
LOC100996660	ncRNA	1.72748
RP11-180I22.2	ncRNA	-1.83851
LOC101926887	ncRNA	2.71344
LOC101927825	ncRNA	2.41525
LOC101928718	ncRNA	-2.77842
LOC102724584	ncRNA	-1.19588
LUCAT1	ncRNA	-3.43941
LOC101928789	ncRNA	1.74645
LINC00857	ncRNA	-2.08327
LOC101928929	ncRNA	-2.08327
LOC101929615	ncRNA	2.47897
LOC284561	ncRNA	-5.02008
LINC00595	ncRNA	-2.08327
LOC101928916	ncRNA	20
RP11-106M7.1	ncRNA	-1.49004
RP11-397C18.2	ncRNA	-1.56404
LOC102723602	ncRNA	-1.37321
CERS6-AS1	ncRNA	1.39912
LOC101929092	ncRNA	-3.04145
LOC102723834	ncRNA	2.09785
RP11-713M15.1	ncRNA	-2.06605
LOC101928045	ncRNA	-3.76134
LOC102724804	ncRNA	2.82737
LOC101928185	ncRNA	-3.70888
LINC00547	ncRNA	3.2969
LINC00643	ncRNA	2.57563
LOC102724040	ncRNA	-20
RP11-4F22.2	ncRNA	-1.53895
LINC01133	ncRNA	-3.41342
LINC00327	ncRNA	2.8009
AC007099.1	ncRNA	-1.39386
LOC101928281	ncRNA	-2.06311
PSMG3-AS1	ncRNA	-1.11852
AC104777.2	ncRNA	-2.82846
LOC101929512	ncRNA	-1.92082
LOC101927647	ncRNA	-1.6134
LOC100288181	ncRNA	-1.17638
AFAP1-AS1	ncRNA	-1.63552
MIR143HG	ncRNA	1.71791
CSPG4P13	ncRNA	3.04601
LOC286189	ncRNA	3.41525
LINC01085	ncRNA	-2.04561
LOC100507156	ncRNA	-1.16794
LOC101929467	ncRNA	-2.89259
RP11-161H23.9	ncRNA	-4.81197
BVES-AS1	ncRNA	-2.05832
AC058791.1	ncRNA	-1.08317
LOC100131564	ncRNA	-1.12064
LOC101929550	ncRNA	-20
PART1	ncRNA	-2.63849
RP11-809M12.1	ncRNA	-20
LINC00968	ncRNA	-1.57376
LOC102723733	ncRNA	-4.47755
MRVI1-AS1	ncRNA	1.72673
RP11-355N15.1	ncRNA	-4.47755
LOC101928373	ncRNA	-1.45322
LOC101930053	ncRNA	-4.04145
RP5-952N6.1	ncRNA	-20
LOC102724550	ncRNA	5.33141
VLDLR-AS1	ncRNA	-4.04145
SLC7A11-AS1	ncRNA	-3.92433
RP11-17A4.2	ncRNA	-1.95399
LOC101928458	ncRNA	1.22435
LINC01111	ncRNA	-20
LINC01060	ncRNA	-1.22063
LINC-PINT	ncRNA	-1.49088
BDNF-AS	ncRNA	-2.48557
RP11-600K15.1	ncRNA	2.40858
PVT1	ncRNA	-1.03199
RP11-696N14.1	ncRNA	1.19802
AC010127.3	ncRNA	1.17846
LOC100505498	ncRNA	-1.91199
ADAMTS9-AS2	ncRNA	-2.47755
RP3-323P13.2	ncRNA	-1.6368
TEX41	ncRNA	-2.14051
RHD	protein-coding	-1.81711
FOXD1	protein-coding	-1.01901
NAT8L	protein-coding	-3.34631
NFATC4	protein-coding	-1.13803
SLC35E2	protein-coding	-1.14201
CCNB2	protein-coding	-1.2166
CCNB1	protein-coding	-1.33116
TMEM155	protein-coding	-20
BASP1	protein-coding	-1.00461
KSR1	protein-coding	-1.67453
SLC6A9	protein-coding	-2.58832
DIO3	protein-coding	-4.36338
FOXF1	protein-coding	-1.49372
CAMKK1	protein-coding	-2.0029
HMGN2	protein-coding	-1.30067
ZNF395	protein-coding	-1.07772
FAM167A	protein-coding	-2.1533
HMMR	protein-coding	-1.19299
ESM1	protein-coding	-5.53895
HELB	protein-coding	-1.81381
MUC5AC	protein-coding	-20
MEST	protein-coding	-4.21566
CYGB	protein-coding	-3.85377
TNFAIP8L1	protein-coding	-1.28841
SGK223	protein-coding	-1.34027
PRCD	protein-coding	-3.03199
ZSCAN31	protein-coding	-2.53261
SOX8	protein-coding	-3.70888
SPC24	protein-coding	-1.1567
CRISPLD2	protein-coding	-1.16064
CEBPG	protein-coding	-1.28656
RGAG1	protein-coding	-3.05832
DOCK3	protein-coding	-1.41739
TDRD1	protein-coding	-1.17987
IL11	protein-coding	-2.62859
IL16	protein-coding	-1.97335
PREX1	protein-coding	-1.55489
NR1D1	protein-coding	-1.24156
NR1D2	protein-coding	-1.23928
ALDH1A3	protein-coding	-2.28812
MTHFD1L	protein-coding	-1.26802
EPHA4	protein-coding	-1.10986
EPHB1	protein-coding	-1.83982
CAPS	protein-coding	-1.2341
PIM1	protein-coding	-1.69171
IL7R	protein-coding	-1.04926
IRS1	protein-coding	-1.07763
LIFR	protein-coding	-1.07187
FLNB	protein-coding	-1.85108
RFX8	protein-coding	-1.94105
SGK1	protein-coding	-1.37879
ALPK2	protein-coding	-2.04552
AFAP1	protein-coding	-1.02483
KIT	protein-coding	-1.28656
TNFSF8	protein-coding	-20
ATP1A2	protein-coding	-2.80198
EDN1	protein-coding	-1.99232
ADRB2	protein-coding	-1.92484
ERMN	protein-coding	-2.91206
CLDN11	protein-coding	-4.30411
STMN3	protein-coding	-3.12391
SLC7A5	protein-coding	-3.12558
LYPD1	protein-coding	-2.63206
LYPD6	protein-coding	-2.22701
KIAA1199	protein-coding	-2.12391
SH2D4A	protein-coding	-2.82403
STMN1	protein-coding	-1.14476
MMP2	protein-coding	-1.2645
ACBD7	protein-coding	-3.31656
MOCOS	protein-coding	-1.53895
IRF1	protein-coding	-1.2341
IL12A	protein-coding	-2.41342
CPA4	protein-coding	-3.95399
ENOX1	protein-coding	-1.90616
PSG5	protein-coding	-1.95399
BIRC5	protein-coding	-1.11576
RND3	protein-coding	-1.14536
ROPN1L	protein-coding	-20
GDF15	protein-coding	-2.68889
FRMD6	protein-coding	-1.19469
SNX9	protein-coding	-1.15013
PSD3	protein-coding	-1.79911
MAB21L1	protein-coding	-1.44431
MAD2L1	protein-coding	-1.04252
ADRBK2	protein-coding	-1.03328
ARNT2	protein-coding	-1.05206
DDIT3	protein-coding	-1.22885
DDIT4	protein-coding	-2.37013
KIAA0101	protein-coding	-1.17764
NRG1	protein-coding	-3.43983
NETO2	protein-coding	-1.35453
HMOX1	protein-coding	-2.06991
CADM1	protein-coding	-2.81997
GRPR	protein-coding	-1.71952
CELSR1	protein-coding	-1.59259
IGF2BP3	protein-coding	-1.17227
NCAM1	protein-coding	-1.31194
SLC40A1	protein-coding	-1.07238
C7orf63	protein-coding	-1.76134
SERPINB2	protein-coding	-4.09695
VWA5A	protein-coding	-1.74754
LOC101928433	protein-coding	-1.02139
IARS	protein-coding	-1.07995
PCK2	protein-coding	-2.03289
FDXR	protein-coding	-1.07952
SERPINE2	protein-coding	-2.99917
PSPH	protein-coding	-1.82234
TIGD2	protein-coding	-1.02674
ADAMTSL1	protein-coding	-1.0071
OLFM4	protein-coding	-20
ATP2A3	protein-coding	-2.29638
CD22	protein-coding	-20
NCAPD2	protein-coding	-1.11757
CBLB	protein-coding	-1.44023
BACH2	protein-coding	-2.22835
WARS	protein-coding	-1.76914
ABCA8	protein-coding	-2.85327
ABCA9	protein-coding	-3.37545
TOP2A	protein-coding	-1.20376
ABCA6	protein-coding	-1.87079
MPP4	protein-coding	-1.71432
LYPD6B	protein-coding	-3.83935
EVI2A	protein-coding	-1.07714
TM4SF20	protein-coding	-3.61695
SCARA3	protein-coding	-1.26302
C10orf111	protein-coding	-2.06946
LFNG	protein-coding	-1.8096
PBK	protein-coding	-1.0845
KIF20A	protein-coding	-1.93168
CMKLR1	protein-coding	-1.02736
SRXN1	protein-coding	-1.24712
DPF3	protein-coding	-2.38968
IGFBPL1	protein-coding	-2.53895
PTER	protein-coding	-1.0591
CXCL12	protein-coding	-2.31814
IL18R1	protein-coding	-2.06946
CAMK1G	protein-coding	-20
PSAT1	protein-coding	-3.62931
NUDT10	protein-coding	-3.58958
HGF	protein-coding	-1.9907
TRIM67	protein-coding	-1.7316
HCN2	protein-coding	-1.34992
STAC	protein-coding	-1.61695
SYT11	protein-coding	-1.23061
LRRC2	protein-coding	-1.69485
PLD1	protein-coding	-1.42197
NUDT6	protein-coding	-1.4228
TNFAIP6	protein-coding	-1.52167
NQO1	protein-coding	-3.15493
TNFSF15	protein-coding	-4.70063
RALGPS2	protein-coding	-2.58272
BICC1	protein-coding	-1.1227
C11orf87	protein-coding	-2.25038
SEL1L3	protein-coding	-1.64369
MKNK2	protein-coding	-1.31991
ACSS3	protein-coding	-1.35097
CSTA	protein-coding	-4.09695
CYP3A5	protein-coding	-1.46856
SMURF2	protein-coding	-1.68657
VLDLR	protein-coding	-1.68349
TRIM16	protein-coding	-1.08666
ANKRD33B	protein-coding	-1.1754
IQGAP3	protein-coding	-1.1433
SERTAD4	protein-coding	-2.29384
CBS	protein-coding	-1.16791
PDGFRA	protein-coding	-1.52012
PXK	protein-coding	-1.15113
AURKA	protein-coding	-1.11895
EXOSC6	protein-coding	-1.01429
TCP11L2	protein-coding	-1.48827
SMAD3	protein-coding	-2.22299
LAPTM5	protein-coding	-20
AKR1C1	protein-coding	-2.00954
TDO2	protein-coding	-4.27592
SFRP1	protein-coding	-1.14847
SFRP4	protein-coding	-1.49588
COL15A1	protein-coding	-1.17349
LOC102724335	protein-coding	-2.38025
THSD7B	protein-coding	-3.32322
NLRP10	protein-coding	-1.29502
TFPI	protein-coding	-1.1467
PRR11	protein-coding	-1.24995
NDRG1	protein-coding	-1.68058
DCLK1	protein-coding	-1.05207
GALM	protein-coding	-1.16549
POPDC3	protein-coding	-1.20892
SYNDIG1	protein-coding	-2.65443
HS6ST1	protein-coding	-1.09817
GYG2	protein-coding	-1.43707
EDA2R	protein-coding	-2.06824
PAPPA2	protein-coding	-5.00202
CYTIP	protein-coding	-20
FAM43A	protein-coding	-2.82298
TBC1D8	protein-coding	-1.32203
LY6K	protein-coding	-1.69095
ADM	protein-coding	-1.66863
SLC12A8	protein-coding	-1.22731
KIF14	protein-coding	-1.38429
SULF2	protein-coding	-1.47231
SIPA1L2	protein-coding	-2.86992
NPTX1	protein-coding	-3.28349
AXL	protein-coding	-1.03664
INS-IGF2	protein-coding	-2.39621
HAS2	protein-coding	-2.48659
PLK2	protein-coding	-2.12829
PLK1	protein-coding	-1.54826
BDNF	protein-coding	-2.4262
GPT2	protein-coding	-1.14737
IGFBP3	protein-coding	-1.49131
FGF5	protein-coding	-1.2023
FGF2	protein-coding	-1.35944
PTTG1	protein-coding	-1.85581
XPOT	protein-coding	-1.20586
GRIN2A	protein-coding	-3.10083
TNXB	protein-coding	-1.95715
ARHGAP35	protein-coding	-1.07926
PAK3	protein-coding	-20
ARHGAP26	protein-coding	-1.04291
MGARP	protein-coding	-2.67281
LURAP1L	protein-coding	-1.26577
FLJ44342	protein-coding	-1.36386
HMGA1	protein-coding	-1.97201
ABCC3	protein-coding	-1.61295
EBF4	protein-coding	-3.95399
EBF3	protein-coding	-1.71862
EBF2	protein-coding	-1.38667
TIMP3	protein-coding	-1.312
SHMT2	protein-coding	-1.19108
YARS	protein-coding	-1.18872
AHRR	protein-coding	-1.88085
KIF2C	protein-coding	-1.0396
DEPDC1	protein-coding	-1.25848
TMEM215	protein-coding	-20
TNS4	protein-coding	-1.25655
NGF	protein-coding	-1.59553
GLP2R	protein-coding	-20
G0S2	protein-coding	-4.31856
CHAC1	protein-coding	-2.65206
CDCA3	protein-coding	-1.42421
TSLP	protein-coding	-1.74058
TMEM71	protein-coding	-2.59142
CACNA2D3	protein-coding	-1.3325
BDKRB2	protein-coding	-2.95399
BDKRB1	protein-coding	-3.46495
NDN	protein-coding	-1.88527
RNF44	protein-coding	-1.12575
GDF5	protein-coding	-2.35453
GDF6	protein-coding	-1.17228
PPP1R17	protein-coding	-4.16344
CTNND2	protein-coding	-2.01812
GABRE	protein-coding	-2.36412
SESN2	protein-coding	-2.20697
PHEX	protein-coding	-1.97505
ABI3BP	protein-coding	-1.01376
MILR1	protein-coding	-1.45406
HMCN1	protein-coding	-1.77414
SEMA3A	protein-coding	-2.90866
SEMA3D	protein-coding	-1.55885
ASNS	protein-coding	-3.284
ADRA1D	protein-coding	-2.03199
EGR1	protein-coding	-2.01436
ASPM	protein-coding	-1.38734
TRIB3	protein-coding	-1.83576
GDNF	protein-coding	-1.71729
TCEA1	protein-coding	-1.29349
SEMA6D	protein-coding	-1.6404
MYC	protein-coding	-1.00196
SOCS2	protein-coding	-2.06361
WISP2	protein-coding	-1.3955
CYP1B1	protein-coding	-1.07988
AARS	protein-coding	-1.02476
NTM	protein-coding	-1.78091
BLID	protein-coding	-1.17229
CDKN3	protein-coding	-1.59251
BBOX1	protein-coding	-3.34631
FRMPD4	protein-coding	-1.66671
MTHFD2	protein-coding	-1.45592
SLC1A3	protein-coding	-1.80904
SLC1A5	protein-coding	-2.05895
STARD8	protein-coding	-1.28369
ELN	protein-coding	-1.56609
STAT4	protein-coding	-1.56404
SLC22A15	protein-coding	-1.04001
FHL2	protein-coding	-1.39602
EIF4EBP1	protein-coding	-1.44427
GALNT15	protein-coding	-4.87523
MARS	protein-coding	-1.1286
FAIM2	protein-coding	-20
HIST1H4A	protein-coding	-1.04934
SH2B3	protein-coding	-1.00427
RUNX1T1	protein-coding	-1.11697
ADCY4	protein-coding	-1.82846
PTCHD4	protein-coding	-2.13721
LDB2	protein-coding	-2.28676
RSL24D1	protein-coding	-1.12167
NEFL	protein-coding	-2.62776
NEFM	protein-coding	-3.45992
EID3	protein-coding	-2.47755
STYK1	protein-coding	-3.29976
DLX2	protein-coding	-1.37759
KRTAP1-5	protein-coding	-1.45714
TRABD2A	protein-coding	-1.73535
GNG11	protein-coding	-1.47286
CCDC148	protein-coding	-1.76134
FAM64A	protein-coding	-1.62924
LOC101059976	protein-coding	-2.03199
TFPI2	protein-coding	-1.99089
LRRC15	protein-coding	-2.67801
PAMR1	protein-coding	-1.71493
PLCB4	protein-coding	-1.58945
SLC7A11	protein-coding	-4.10614
SLC7A14	protein-coding	-5.23939
ADAMTS6	protein-coding	-1.58012
LRRC49	protein-coding	-1.23517
IL1RL1	protein-coding	-4.20192
BUB1	protein-coding	-1.03186
TBX3	protein-coding	-1.03491
SLC3A2	protein-coding	-1.67041
SNTG2	protein-coding	-3.08327
DLGAP5	protein-coding	-1.35432
STAC3	protein-coding	-1.97547
CCR7	protein-coding	-1.60169
MID1	protein-coding	-1.51856
SNTB1	protein-coding	-1.37868
NEK2	protein-coding	-1.55102
PITPNC1	protein-coding	-2.26168
ABL1	protein-coding	-1.19147
SAV1	protein-coding	-1.25945
CCDC129	protein-coding	-2.04914
KIAA1644	protein-coding	-1.7575
MASP1	protein-coding	-3.27592
GCLM	protein-coding	-1.46978
SYT7	protein-coding	-2.81197
SECTM1	protein-coding	-1.22345
ARL4C	protein-coding	-1.40516
HHAT	protein-coding	-1.17316
BBC3	protein-coding	-1.42792
CLMP	protein-coding	-2.17943
PLEKHA5	protein-coding	-1.21877
PLEKHA7	protein-coding	-2.39456
CCL2	protein-coding	-1.33223
ZNF521	protein-coding	-1.53895
FST	protein-coding	-3.4975
APOLD1	protein-coding	-1.40704
RIN1	protein-coding	-1.06388
NMT2	protein-coding	-1.54407
BTG1	protein-coding	-1.52618
DMKN	protein-coding	-1.32903
NR4A2	protein-coding	-1.92361
FCRLA	protein-coding	-1.4478
FCRLB	protein-coding	-1.28897
ST3GAL5	protein-coding	-1.72758
ARHGAP11A	protein-coding	-1.01221
BCAT1	protein-coding	-1.19416
FAM129A	protein-coding	-1.32268
SYBU	protein-coding	-1.0739
DHRS3	protein-coding	-4.40873
PHLDA1	protein-coding	-2.02189
TROAP	protein-coding	-1.12999
KCND3	protein-coding	-2.3211
PODXL	protein-coding	-1.36518
ADAM12	protein-coding	-1.45435
NCKAP5	protein-coding	-2.41996
HS3ST3B1	protein-coding	-1.59142
MYCT1	protein-coding	-20
KCTD12	protein-coding	-2.51858
CCDC102B	protein-coding	-1.32815
KCTD16	protein-coding	-3.64013
KCNK2	protein-coding	-1.56381
CTH	protein-coding	-1.35065
KCNJ2	protein-coding	-3.80198
ROBO3	protein-coding	-1.35392
CDHR3	protein-coding	-1.34852
SLC4A5	protein-coding	-1.12241
F2RL2	protein-coding	-1.87299
FBXO43	protein-coding	-1.39693
NDNF	protein-coding	-3.76134
MLC1	protein-coding	-2.62641
PELI2	protein-coding	-1.28977
LOC101060391	protein-coding	-3.27592
GREM2	protein-coding	-2.37775
GREM1	protein-coding	-1.05739
KCNH1	protein-coding	-1.94105
CDC25C	protein-coding	-1.3212
KCNG1	protein-coding	-1.72591
FAM110B	protein-coding	-1.56391
UBL4B	protein-coding	-3.95399
TUBE1	protein-coding	-1.26934
PTGES	protein-coding	-1.75422
TMEM132B	protein-coding	-1.075
UBALD2	protein-coding	-1.04756
SHISA2	protein-coding	-5.23939
PTGDS	protein-coding	-2.16044
GPRC5A	protein-coding	-4.00565
CPZ	protein-coding	-2.74476
PHGDH	protein-coding	-2.99543
VEGFA	protein-coding	-1.80068
OSR1	protein-coding	-2.906
OSR2	protein-coding	-1.83663
CYYR1	protein-coding	-2.65443
TGFBI	protein-coding	-1.86295
GFAP	protein-coding	-20
SAMD12	protein-coding	-1.54694
DLC1	protein-coding	-1.31586
LRP1B	protein-coding	-4.02438
SMN1	protein-coding	-1.25167
AJUBA	protein-coding	-1.07428
SAPCD2	protein-coding	-2.42111
UGCG	protein-coding	-2.62389
CENPA	protein-coding	-1.20192
CENPF	protein-coding	-1.2662
CENPM	protein-coding	-1.21179
ADD3	protein-coding	-1.38408
COLEC12	protein-coding	-2.29638
THSD1	protein-coding	-1.5243
CIT	protein-coding	-1.0903
SLC2A12	protein-coding	-2.53149
MAMLD1	protein-coding	-1.36282
LIF	protein-coding	-3.40479
RGS20	protein-coding	-1.50858
DEPTOR	protein-coding	-2.21615
ANKFN1	protein-coding	-3.39542
PTGR1	protein-coding	-1.04831
SPRY2	protein-coding	-1.41986
ADM2	protein-coding	-2.15562
ANKRD55	protein-coding	-20
BHMT	protein-coding	-2.43941
PTPRU	protein-coding	-1.46549
PTGS2	protein-coding	-1.12219
RGMB	protein-coding	-1.57
ANKRD29	protein-coding	-1.45906
ANKRD28	protein-coding	-1.0715
PDE7B	protein-coding	-1.80314
CDC42EP2	protein-coding	-1.96681
NEK10	protein-coding	-1.66685
LXN	protein-coding	-1.49059
PDE4D	protein-coding	-2.34567
FAM212B	protein-coding	-2.30414
GFRA1	protein-coding	-1.61216
EYA4	protein-coding	-1.63823
EYA1	protein-coding	-1.15277
LOC728392	protein-coding	-1.2977
PDE1C	protein-coding	-2.28855
SYNPO	protein-coding	-1.2546
PER2	protein-coding	-1.03751
PER3	protein-coding	-1.84965
PDCD1LG2	protein-coding	-1.05068
IFI30	protein-coding	-1.37198
UNC5D	protein-coding	-6.34057
UNC5B	protein-coding	-3.06918
EPGN	protein-coding	-1.5729
ARHGEF2	protein-coding	-1.75694
ADAMTS15	protein-coding	-1.63276
TOX	protein-coding	-1.07859
CDC20	protein-coding	-1.29043
TK1	protein-coding	-1.13339
AVPI1	protein-coding	-1.48027
TM4SF1	protein-coding	-3.17789
PRKCA	protein-coding	-1.09945
PRKCE	protein-coding	-1.07387
IGF2	protein-coding	-2.3772
FAM107B	protein-coding	-1.39261
TXNRD1	protein-coding	-2.31614
TRIM16L	protein-coding	-2.55885
TAC1	protein-coding	-3.41342
KRT34	protein-coding	-1.42347
TEF	protein-coding	-1.25355
MN1	protein-coding	-1.17882
CEACAM19	protein-coding	-1.49773
IRF2BPL	protein-coding	-1.16811
PANX2	protein-coding	-1.14513
PLXNC1	protein-coding	-1.17811
AGTR1	protein-coding	-2.12391
C15orf61	protein-coding	-1.45649
SLC16A6	protein-coding	-3.14513
TNIP3	protein-coding	-3.00461
MME	protein-coding	-1.09443
CCND2	protein-coding	1.33552
CCND3	protein-coding	1.18352
ECM2	protein-coding	1.03968
SGCD	protein-coding	2.09236
FDPS	protein-coding	1.10988
ZBTB16	protein-coding	20
MFAP3L	protein-coding	1.16526
CORIN	protein-coding	5.78189
SLC35F5	protein-coding	1.03551
DIO2	protein-coding	2.74234
AFF2	protein-coding	2.40956
CLEC3B	protein-coding	1.68987
PGM2L1	protein-coding	1.15318
RASSF2	protein-coding	1.87708
RASSF3	protein-coding	1.32379
CYBB	protein-coding	20
RASSF7	protein-coding	1.69371
STEAP4	protein-coding	6.0347
DYSF	protein-coding	1.6182
HES4	protein-coding	1.54306
C19orf66	protein-coding	1.03542
TNFAIP8L3	protein-coding	2.93583
EPPK1	protein-coding	2.24241
ADH1B	protein-coding	3.6108
RBM20	protein-coding	3.66072
SYPL2	protein-coding	1.98012
AOC3	protein-coding	3.8009
ARHGDIB	protein-coding	1.71228
CHN1	protein-coding	1.03355
IL32	protein-coding	5.19576
CMPK2	protein-coding	3.63803
CRISPLD1	protein-coding	1.21076
HTR1B	protein-coding	2.3956
TINAGL1	protein-coding	2.1303
ATHL1	protein-coding	1.14034
SAMD9	protein-coding	1.35342
PLA2G15	protein-coding	1.25368
HELZ2	protein-coding	2.2494
HTR2A	protein-coding	20
FOXS1	protein-coding	1.37626
RASL12	protein-coding	2.52216
TDRD7	protein-coding	1.04601
CX3CL1	protein-coding	6.09912
THEMIS2	protein-coding	1.69809
ALDH1B1	protein-coding	1.18327
OSBPL5	protein-coding	1.00411
SLC25A21	protein-coding	1.60825
SLC25A23	protein-coding	1.48962
RTP4	protein-coding	2.1753
VAV3	protein-coding	3.46105
TMEM100	protein-coding	2.56203
ACAT2	protein-coding	1.14528
TFAP2B	protein-coding	2.10491
COLGALT2	protein-coding	1.50653
TP53I11	protein-coding	1.77671
SLC24A3	protein-coding	2.1083
PDK3	protein-coding	2.0039
FBXL22	protein-coding	1.44398
C3orf70	protein-coding	2.23114
C16orf87	protein-coding	1.10175
TMEM144	protein-coding	1.6816
PLA2G4C	protein-coding	1.06213
APOL1	protein-coding	1.16255
APOL2	protein-coding	1.43322
C3orf55	protein-coding	1.50996
TSPAN2	protein-coding	1.90731
FOXO1	protein-coding	1.851
NPY2R	protein-coding	3.21594
SOD2	protein-coding	2.05159
SOD3	protein-coding	2.06037
TNFSF9	protein-coding	1.38359
ENPEP	protein-coding	1.47589
ACTG2	protein-coding	3.7903
PICALM	protein-coding	1.39016
FMNL2	protein-coding	1.13309
ISG15	protein-coding	4.2432
LGMN	protein-coding	1.51717
LONRF1	protein-coding	1.51356
ACTC1	protein-coding	6.05351
HSD17B14	protein-coding	1.54269
MERTK	protein-coding	20
SCD	protein-coding	1.40638
PRUNE2	protein-coding	1.29467
USP18	protein-coding	2.52994
ACTA2	protein-coding	2.13413
ANKRD6	protein-coding	1.71494
ANKRD1	protein-coding	3.33903
CHST11	protein-coding	1.06723
OVCH1	protein-coding	1.82045
PRELP	protein-coding	2.30766
HABP4	protein-coding	1.07281
LPIN3	protein-coding	1.05339
SLC7A2	protein-coding	3.35452
IL17D	protein-coding	1.50849
TCEAL4	protein-coding	2.21662
NRP2	protein-coding	2.64088
IRF7	protein-coding	1.82045
IRF6	protein-coding	2.29063
IRF9	protein-coding	1.11485
LOC102724170	protein-coding	1.44655
TPM2	protein-coding	1.64487
IL17RE	protein-coding	1.09724
NRXN3	protein-coding	1.55623
BIRC3	protein-coding	1.69053
TAGLN	protein-coding	1.63881
FRMD5	protein-coding	1.50734
EFHD1	protein-coding	2.14459
PTPDC1	protein-coding	1.18659
LOC102724141	protein-coding	4.63097
LAMA5	protein-coding	2.82746
PSD4	protein-coding	2.99776
LAMA2	protein-coding	1.31109
GUCY1A3	protein-coding	1.54939
GUCY1A2	protein-coding	1.35243
STK38L	protein-coding	3.19218
TAPBP	protein-coding	1.04082
LSM11	protein-coding	1.31229
TSPAN13	protein-coding	1.76483
TSPAN15	protein-coding	1.84438
GPM6B	protein-coding	1.41175
UAP1L1	protein-coding	1.14284
NREP	protein-coding	1.56496
FILIP1L	protein-coding	1.03498
RELB	protein-coding	1.72673
B3GALT1	protein-coding	2.25412
RASD2	protein-coding	2.29394
CD82	protein-coding	1.04839
CD83	protein-coding	1.63097
ACVRL1	protein-coding	1.20895
IGF2BP1	protein-coding	1.85054
GGT5	protein-coding	1.20805
CD93	protein-coding	3.16149
DACT3	protein-coding	1.5291
CD97	protein-coding	1.32501
PCSK7	protein-coding	1.30777
PCSK9	protein-coding	1.32102
CYP19A1	protein-coding	2.24241
RENBP	protein-coding	1.18472
PCGF5	protein-coding	1.28931
CYP26B1	protein-coding	3.74645
OSBPL10	protein-coding	1.1898
A2M	protein-coding	3.5248
COL14A1	protein-coding	1.15546
SLC25A4	protein-coding	1.23111
SERPING1	protein-coding	1.07458
LANCL3	protein-coding	1.91108
CNTN1	protein-coding	1.83028
CD276	protein-coding	1.36067
RERG	protein-coding	20
CRIP1	protein-coding	1.35548
CRIP2	protein-coding	1.46755
ANO4	protein-coding	1.26478
ANO1	protein-coding	2.1445
SERPINI1	protein-coding	1.40356
FMO3	protein-coding	2.25246
MLLT11	protein-coding	1.14304
DHX58	protein-coding	1.45895
JAKMIP2	protein-coding	1.8789
KIF26B	protein-coding	1.08095
ABCA3	protein-coding	1.21447
DAB2IP	protein-coding	1.50689
MPP7	protein-coding	1.44128
IGFN1	protein-coding	3.85337
TYMP	protein-coding	2.80617
SCN2A	protein-coding	1.84285
RRAGD	protein-coding	1.22812
GBP3	protein-coding	1.10921
CSF1	protein-coding	1.2016
GBP1	protein-coding	1.34316
MMP16	protein-coding	1.09009
MMP11	protein-coding	2.07811
SCN9A	protein-coding	1.60007
HCK	protein-coding	2.32612
PARP9	protein-coding	2.14892
GPC4	protein-coding	1.99864
LYVE1	protein-coding	3.62294
QPRT	protein-coding	2.47897
TMEM178B	protein-coding	1.28037
ANKDD1B	protein-coding	2.8009
HCN3	protein-coding	1.49667
CXCL10	protein-coding	20
DDX60L	protein-coding	1.56612
TRIM47	protein-coding	1.81571
MYADM	protein-coding	1.42461
GJA9	protein-coding	1.47706
TMTC1	protein-coding	1.22677
KANK1	protein-coding	1.01339
L3MBTL3	protein-coding	1.02535
TRIM36	protein-coding	4.47706
GJA4	protein-coding	3.98853
ZFP92	protein-coding	1.72408
ICAM1	protein-coding	3.63324
PAX9	protein-coding	1.7458
SYT16	protein-coding	1.9789
AFAP1L1	protein-coding	1.51908
TNFAIP3	protein-coding	1.19017
OXTR	protein-coding	2.34241
ZFP36	protein-coding	1.27727
PDGFD	protein-coding	1.74345
PLAT	protein-coding	1.32612
GRIA1	protein-coding	3.13751
ANKRD34A	protein-coding	1.24765
SEL1L2	protein-coding	20
RIMS1	protein-coding	1.79898
ANGPTL4	protein-coding	1.59557
ANGPTL6	protein-coding	1.36538
NHLRC3	protein-coding	1.22683
C11orf96	protein-coding	3.06066
SORT1	protein-coding	1.58136
CSTB	protein-coding	1.07194
KCNMB1	protein-coding	1.83956
ANKS1B	protein-coding	1.63519
C10orf10	protein-coding	2.16429
RDH5	protein-coding	1.23763
TRIM21	protein-coding	1.43554
COX7A1	protein-coding	1.05861
CD4	protein-coding	1.09305
DDR1	protein-coding	1.10144
RAB11FIP1	protein-coding	1.71183
COL8A1	protein-coding	1.3985
CHSY3	protein-coding	1.79047
PDGFRL	protein-coding	1.22734
SQLE	protein-coding	1.17368
GPR63	protein-coding	1.48459
GAS1	protein-coding	1.76382
PARM1	protein-coding	4.00921
PRKAA2	protein-coding	1.83995
SP110	protein-coding	2.80404
MRVI1	protein-coding	2.18776
LRRN3	protein-coding	1.42041
COMTD1	protein-coding	1.54851
LUZP2	protein-coding	2.34858
PHKA1	protein-coding	2.84248
LGI3	protein-coding	3.74645
LGI4	protein-coding	1.71844
ENPP1	protein-coding	1.46161
ITIH3	protein-coding	2.19285
MFGE8	protein-coding	1.23118
CERS6	protein-coding	1.13842
CSRP2	protein-coding	1.89776
DHRS7B	protein-coding	1.16618
TMEM30B	protein-coding	2.1753
TNFRSF10A	protein-coding	1.18938
KIAA0040	protein-coding	3.03798
SHC4	protein-coding	3.91821
SLC16A12	protein-coding	2.2684
ULBP2	protein-coding	1.11528
ID3	protein-coding	1.10381
AK4	protein-coding	2.04601
FSTL3	protein-coding	1.7068
ETV1	protein-coding	1.04967
AGT	protein-coding	2.04601
RPP25	protein-coding	1.35281
RCSD1	protein-coding	2.22234
RSAD2	protein-coding	5.76369
DNAJB4	protein-coding	1.76597
FBXO6	protein-coding	1.36387
GRB14	protein-coding	2.41525
RAB15	protein-coding	1.80434
TNIK	protein-coding	1.35587
POPDC2	protein-coding	2.77873
C3	protein-coding	2.69809
RNF152	protein-coding	1.59352
XIRP1	protein-coding	4.43833
TSC22D3	protein-coding	2.19861
FAM46B	protein-coding	2.15779
KIAA0226L	protein-coding	2.73789
SCML1	protein-coding	1.15492
EPSTI1	protein-coding	1.99801
MYOZ2	protein-coding	1.96028
OR51E2	protein-coding	3.90399
OR51E1	protein-coding	20
IL8	protein-coding	4.43833
ODF3B	protein-coding	2.41947
IGH	protein-coding	3.89247
FGF13	protein-coding	2.018
LEPR	protein-coding	1.07478
SAMHD1	protein-coding	1.64892
SLCO3A1	protein-coding	1.05156
ARHGAP6	protein-coding	1.35518
CLIC3	protein-coding	2.11014
TBC1D1	protein-coding	1.105
GPR116	protein-coding	20
PRR5L	protein-coding	1.74242
P4HA3	protein-coding	1.28035
CHST2	protein-coding	2.22396
IDI1	protein-coding	1.32398
CHST6	protein-coding	1.29977
FKBP5	protein-coding	4.06252
SULF1	protein-coding	2.27278
IFI44L	protein-coding	4.7773
ISM1	protein-coding	1.68073
HAS3	protein-coding	2.52045
AHNAK2	protein-coding	1.78087
PCDH10	protein-coding	2.13033
SPTB	protein-coding	3.08349
ADARB1	protein-coding	1.03318
ATP10A	protein-coding	2.08194
FNBP1L	protein-coding	1.68647
HSD17B6	protein-coding	2.0569
HSD17B7	protein-coding	1.27679
TRAF1	protein-coding	1.25605
BMP2	protein-coding	3.63097
INSIG1	protein-coding	1.38761
NTRK2	protein-coding	2.0318
RANBP3L	protein-coding	3.97201
C2CD2	protein-coding	1.01693
GPX7	protein-coding	1.19209
FGD4	protein-coding	1.58647
KIAA1456	protein-coding	1.13263
RHBDL2	protein-coding	1.18803
SEPT5	protein-coding	1.68654
APOD	protein-coding	1.77184
APOE	protein-coding	2.1213
APOB	protein-coding	5.37991
MYOM1	protein-coding	3.10712
ARHGAP10	protein-coding	1.43472
TIMP4	protein-coding	3.89492
NT5C1B	protein-coding	1.47343
MYL9	protein-coding	1.085
MGAM	protein-coding	1.5439
PLAC4	protein-coding	1.18723
GRAMD3	protein-coding	1.50776
PLAC9	protein-coding	1.01487
TNS1	protein-coding	1.33323
TET1	protein-coding	1.95333
EIF2AK2	protein-coding	1.30944
NFASC	protein-coding	1.04921
NFIA	protein-coding	1.22475
PALLD	protein-coding	1.59689
NES	protein-coding	1.02633
COBLL1	protein-coding	2.12605
CAPN9	protein-coding	2.1164
FABP4	protein-coding	3.18352
FABP3	protein-coding	2.66598
PLEKHN1	protein-coding	1.92866
ROR1	protein-coding	1.21155
NCR3LG1	protein-coding	1.51653
BST2	protein-coding	5.96884
GLDN	protein-coding	6.6694
TCN2	protein-coding	1.83189
SESN3	protein-coding	1.07849
PDLIM3	protein-coding	2.38997
MOB3B	protein-coding	1.94648
ZNF704	protein-coding	1.49253
SCGB3A2	protein-coding	4.13348
IKZF2	protein-coding	2.25406
PLEKHG3	protein-coding	1.49852
PPP1R3B	protein-coding	1.26636
PLA2R1	protein-coding	1.24466
STBD1	protein-coding	1.29624
ZSWIM4	protein-coding	1.03464
SEMA3E	protein-coding	2.06986
DMPK	protein-coding	1.03557
ADRA2A	protein-coding	2.00021
ADRA1B	protein-coding	1.30905
IGSF10	protein-coding	2.49722
CDS1	protein-coding	1.77641
PPP1R9A	protein-coding	1.68073
P2RY6	protein-coding	1.83956
ASPN	protein-coding	2.06986
FILIP1	protein-coding	3.00949
HIP1	protein-coding	1.50058
PTGER3	protein-coding	1.80815
MITF	protein-coding	1.24765
ITGAV	protein-coding	1.29002
ENDOD1	protein-coding	1.46636
ITGA1	protein-coding	1.59307
ITGA3	protein-coding	1.27359
ITGA5	protein-coding	2.02343
ITGA7	protein-coding	2.21479
KLHL3	protein-coding	1.05112
SCG2	protein-coding	1.69662
CTHRC1	protein-coding	1.19188
NRK	protein-coding	3.15035
TPD52L1	protein-coding	1.18153
CTTNBP2	protein-coding	1.45482
SLC38A11	protein-coding	5.29394
PKDCC	protein-coding	1.131
STARD4	protein-coding	1.34533
RASGEF1B	protein-coding	2.21594
IFI6	protein-coding	4.49051
PIP4K2C	protein-coding	1.00529
SLC20A2	protein-coding	1.42572
MAP2	protein-coding	3.04783
BCL6	protein-coding	1.0576
PCDH7	protein-coding	2.2806
PCDH9	protein-coding	2.00021
HIP1R	protein-coding	1.57294
CDKL2	protein-coding	2.97675
PCDH1	protein-coding	1.62854
LGALS9	protein-coding	1.49181
ALDOC	protein-coding	1.37572
CSPG4	protein-coding	1.99752
LDHD	protein-coding	2.08554
EOGT	protein-coding	1.15048
MYH11	protein-coding	4.41042
INPP4B	protein-coding	4.78262
GALNT18	protein-coding	2.66845
HMGCS1	protein-coding	2.07723
RFTN2	protein-coding	1.05554
TLDC2	protein-coding	2.15035
BHLHE41	protein-coding	1.73407
PTK2B	protein-coding	1.51329
MYLK	protein-coding	1.93597
TRPC6	protein-coding	1.36768
DUSP1	protein-coding	1.33587
LDB3	protein-coding	1.26723
SNAP91	protein-coding	2.85337
RIPK4	protein-coding	1.43467
PRSS35	protein-coding	1.49852
DDX43	protein-coding	1.09664
FZD5	protein-coding	1.0831
CDKN2B	protein-coding	1.25474
RGS7BP	protein-coding	3.33141
CCL28	protein-coding	1.20252
NT5DC3	protein-coding	1.79498
MYO7B	protein-coding	1.16041
DHCR7	protein-coding	1.28335
IFIH1	protein-coding	3.28548
SYNM	protein-coding	1.84546
TLR2	protein-coding	2.23866
LMCD1	protein-coding	1.47228
MICALCL	protein-coding	1.78298
PARP10	protein-coding	1.04956
SYN2	protein-coding	2.90851
PARP14	protein-coding	1.40184
PARP12	protein-coding	1.74484
GEM	protein-coding	1.48699
DDX58	protein-coding	2.91511
LRRC32	protein-coding	1.43135
ST6GALNAC5	protein-coding	3.15035
GCA	protein-coding	1.36794
ADAMTS7	protein-coding	1.03542
HLA-F	protein-coding	1.20235
ADAMTS4	protein-coding	1.48707
DDX60	protein-coding	1.60383
STAB2	protein-coding	2.09332
HERC6	protein-coding	3.71599
METTL7A	protein-coding	1.51933
ZNF600	protein-coding	1.58854
HDAC9	protein-coding	1.10881
EDIL3	protein-coding	1.04058
IFITM2	protein-coding	1.0884
OAS2	protein-coding	4.05866
IFITM1	protein-coding	3.33141
OAS1	protein-coding	6.49447
IFITM3	protein-coding	1.06541
OAS3	protein-coding	4.35577
LTBP1	protein-coding	1.48563
PLCL1	protein-coding	2.20444
OASL	protein-coding	3.7802
ZCCHC2	protein-coding	1.11848
MRAP2	protein-coding	3.02255
SUSD5	protein-coding	1.22734
ACPL2	protein-coding	1.28139
CCDC107	protein-coding	1.42769
MCTP1	protein-coding	2.65745
GP1BB	protein-coding	1.43458
AP1S3	protein-coding	1.19209
FNDC1	protein-coding	1.51221
TP53INP2	protein-coding	1.20548
PLSCR1	protein-coding	2.02736
PPAP2A	protein-coding	1.00431
ENAH	protein-coding	1.51174
NEXN	protein-coding	1.08426
CLMN	protein-coding	2.00162
C1QTNF1	protein-coding	2.24074
C1QTNF5	protein-coding	2.21171
SLITRK1	protein-coding	2.04601
SLITRK4	protein-coding	3.3145
DNASE1L1	protein-coding	1.23696
ABRA	protein-coding	3.8915
RCAN3	protein-coding	1.0892
LCP1	protein-coding	2.88251
TLE2	protein-coding	3.78298
XAF1	protein-coding	1.69418
IFIT5	protein-coding	1.16394
WFDC1	protein-coding	1.90559
IFIT1	protein-coding	4.92957
IFIT2	protein-coding	3.18742
IFIT3	protein-coding	3.13383
TRPV2	protein-coding	1.21025
FRY	protein-coding	2.34983
FKBP1B	protein-coding	2.60673
LOC101928841	protein-coding	4.10078
MYO1D	protein-coding	1.0425
UNC13A	protein-coding	1.26718
PPP1R13L	protein-coding	1.89958
PPP1R13B	protein-coding	1.41279
CYSTM1	protein-coding	1.0383
PPP1R14A	protein-coding	2.32019
SLC29A2	protein-coding	2.20588
SLC29A1	protein-coding	1.06144
SORBS1	protein-coding	3.96396
ACAN	protein-coding	1.7154
DPY19L2	protein-coding	1.25496
MT1X	protein-coding	1.50544
MT1M	protein-coding	3.1753
ASB2	protein-coding	1.85864
PCOLCE2	protein-coding	2.10491
MEGF6	protein-coding	1.08695
MT2A	protein-coding	1.40785
C5orf46	protein-coding	3.59033
CALCRL	protein-coding	3.05515
EHD1	protein-coding	1.16709
SNCAIP	protein-coding	3.14034
OMD	protein-coding	2.54628
TUBB2A	protein-coding	1.97267
SULT1B1	protein-coding	5.2102
SAMD9L	protein-coding	1.95005
BATF	protein-coding	1.805
SLMAP	protein-coding	1.17011
PLXDC2	protein-coding	1.30905
PLXDC1	protein-coding	2.04881
SPARCL1	protein-coding	4.24103
COL4A5	protein-coding	2.14362
COL4A1	protein-coding	1.26569
DBI	protein-coding	1.51192
TAP1	protein-coding	1.34751
CSRNP3	protein-coding	4.21594
MATN3	protein-coding	1.24479
BAIAP2L2	protein-coding	1.11842
VCL	protein-coding	1.32519
DIXDC1	protein-coding	1.22423
HOPX	protein-coding	2.89036
PPARG	protein-coding	1.125
DTX3L	protein-coding	1.48436
MLKL	protein-coding	1.15791
SLC44A2	protein-coding	1.05413
C1orf198	protein-coding	1.03732
ZC3H12A	protein-coding	1.16575
FADS2	protein-coding	1.83065
TC2N	protein-coding	2.85337
RHOD	protein-coding	1.8292
CDHR1	protein-coding	1.65899
PANK1	protein-coding	1.03341
ALPL	protein-coding	1.27464
RHOU	protein-coding	2.00021
RNF144B	protein-coding	1.14084
HLA-DMA	protein-coding	1.66268
KCNK6	protein-coding	1.3593
DTNA	protein-coding	1.3196
B4GALNT1	protein-coding	1.04601
MCAM	protein-coding	2.82339
ITGA10	protein-coding	1.63622
C8orf34	protein-coding	2.43412
TUBB6	protein-coding	1.05662
SLC4A8	protein-coding	1.01557
LINGO1	protein-coding	1.8186
ZNF860	protein-coding	2.57653
CYP7B1	protein-coding	4.80413
KCNS3	protein-coding	1.88731
LIMS2	protein-coding	1.27323
PTGDR	protein-coding	1.92048
FRZB	protein-coding	5.15314
TGFB3	protein-coding	1.4583
GSTT2B	protein-coding	1.15737
CPM	protein-coding	4.24395
AKAP5	protein-coding	1.45264
AKAP6	protein-coding	1.80381
KIAA1161	protein-coding	1.23683
KCNQ4	protein-coding	1.81155
FBLN5	protein-coding	1.46548
DIAPH2	protein-coding	1.38907
KLHL30	protein-coding	2.02135
CFB	protein-coding	1.38162
TUBA1A	protein-coding	1.51198
ADAM23	protein-coding	1.49876
GALNT6	protein-coding	1.74256
LEP	protein-coding	5.33141
CFH	protein-coding	2.18274
B3GNT5	protein-coding	1.42555
B3GNT2	protein-coding	1.09945
PTGIR	protein-coding	1.59703
C1orf110	protein-coding	2.23866
COL11A1	protein-coding	3.26405
SLC15A3	protein-coding	1.13912
AMACR	protein-coding	1.38609
RGS16	protein-coding	3.6006
KCNJ15	protein-coding	3.07996
RGS19	protein-coding	1.30608
C1QTNF9B	protein-coding	2.63097
CCDC85A	protein-coding	1.27278
NXPH3	protein-coding	4.00537
ATL1	protein-coding	1.04834
COL3A1	protein-coding	1.42304
RGS4	protein-coding	2.18628
RGS9	protein-coding	2.10187
CNNM2	protein-coding	1.35389
CLDN1	protein-coding	1.67105
SPRY4	protein-coding	1.28663
SH3BGRL2	protein-coding	2.54586
DSTN	protein-coding	1.14222
NPAS2	protein-coding	1.43965
PTGES3L	protein-coding	2.21594
ANKRD35	protein-coding	1.86704
MEF2C	protein-coding	1.16404
GMPR	protein-coding	1.2048
GABRB1	protein-coding	2.92048
FAM84A	protein-coding	1.24331
FAM213A	protein-coding	1.40457
ZNF836	protein-coding	1.05101
CASZ1	protein-coding	2.28702
ZNF823	protein-coding	1.20235
OLFML3	protein-coding	1.2674
IFI44	protein-coding	3.18689
CNN1	protein-coding	2.70579
PER1	protein-coding	1.91153
IFI35	protein-coding	1.67318
DPT	protein-coding	2.36794
FBLIM1	protein-coding	1.36021
CACNA1H	protein-coding	1.57439
IFI27	protein-coding	4.27867
JPH2	protein-coding	1.60386
CNR1	protein-coding	3.55697
UNC5C	protein-coding	1.55883
CRYAB	protein-coding	2.73226
DSP	protein-coding	1.10633
TRNP1	protein-coding	1.79777
MUC1	protein-coding	1.86271
ADAMTS19	protein-coding	1.8186
ZNF793	protein-coding	1.19285
GDPD1	protein-coding	2.21594
MX1	protein-coding	5.83827
MX2	protein-coding	3.24839
DSG2	protein-coding	1.26343
RAPGEF5	protein-coding	1.98983
KIAA1024	protein-coding	1.01687
HEY1	protein-coding	2.48
HEY2	protein-coding	1.42582
PLXNA2	protein-coding	1.70245
MGP	protein-coding	6.15871
DES	protein-coding	4.65482
COL12A1	protein-coding	1.85627
GNB4	protein-coding	1.01595
FAM107A	protein-coding	3.13348
IL12RB2	protein-coding	1.65008
HSPB7	protein-coding	3.22038
HSPB6	protein-coding	1.18106
HSPB3	protein-coding	1.95986
NFKBIA	protein-coding	1.1689
HAPLN3	protein-coding	1.84102
RASGRP2	protein-coding	2.69915
HSPB1	protein-coding	1.63731
HAPLN1	protein-coding	1.13199
AXIN2	protein-coding	1.33124
FAM47E-STBD1	protein-coding	1.22172
H2AFJ	protein-coding	1.16959
MSMO1	protein-coding	1.4329
SLC9A3R1	protein-coding	1.08054
PTPLA	protein-coding	1.10697
KRT7	protein-coding	1.01621
CXCL6	protein-coding	20
CXCL5	protein-coding	3.16149
CXCL3	protein-coding	4.04601
DCHS2	protein-coding	1.39394
CXCL1	protein-coding	4.98082
HSPA2	protein-coding	1.13508
TES	protein-coding	1.09848
PLXND1	protein-coding	1.02043
LIN7A	protein-coding	1.3372
PLXNB1	protein-coding	1.09959
MFAP4	protein-coding	1.86331
MFAP5	protein-coding	1.74234

## Sheet: D7 vs D0
AccID	type_of_gene	Log2FC
KCNH1-IT1	ncRNA	-3.39509
LOC101927561	ncRNA	-3.00903
LOC102723880	ncRNA	-2.50379
LOC102723587	ncRNA	-2.29474
RP11-527H14.3	ncRNA	-1.93293
LOC100131315	ncRNA	-1.57532
C5orf55	ncRNA	-1.54138
SNHG8	ncRNA	-1.34029
SNHG5	ncRNA	-1.30487
LOC101928411	ncRNA	-1.30216
LOC102723331	ncRNA	1.08045
LOC284454	ncRNA	1.22014
LOC102723666	ncRNA	1.82408
LOC101927328	ncRNA	2.2984
RP11-399K21.14	ncRNA	2.40149
LOC101928746	ncRNA	2.93583
LOC101929133	ncRNA	3.77233
LOC101929309	ncRNA	20
LOC102723972	ncRNA	20
WDR52	protein-coding	1.21477
CCND3	protein-coding	1.21779
RHD	protein-coding	-1.13319
ECM2	protein-coding	2.28678
FOXD1	protein-coding	-1.28819
SGCD	protein-coding	1.79938
NFATC2	protein-coding	1.10928
NFATC1	protein-coding	1.11728
CCNB2	protein-coding	-1.57143
ITM2B	protein-coding	1.06682
CCNB1	protein-coding	-1.70502
CORO6	protein-coding	1.39075
TMEM155	protein-coding	-20
AGAP11	protein-coding	1.94561
CGREF1	protein-coding	1.4874
FDPS	protein-coding	1.33472
ZBTB16	protein-coding	20
MFAP3L	protein-coding	1.68867
CHRM2	protein-coding	-1.53449
SPTBN5	protein-coding	1.28894
KSR1	protein-coding	-1.11705
CCNA2	protein-coding	-1.31015
SLC39A13	protein-coding	1.14643
TCTEX1D4	protein-coding	1.671
CYP4X1	protein-coding	4.17287
SLC6A9	protein-coding	-1.45208
LMNB1	protein-coding	-1.11294
CORIN	protein-coding	6.68306
CFHR5	protein-coding	4.52079
SLC35F1	protein-coding	4.12847
CHRNA1	protein-coding	4.03537
DIO3	protein-coding	-1.47356
DIO2	protein-coding	3.38761
AFF2	protein-coding	2.88986
AFF3	protein-coding	-1.76152
HMGN2	protein-coding	-1.35046
SPAG5	protein-coding	-1.25718
CLEC3B	protein-coding	2.19672
PGM2L1	protein-coding	1.33236
ZNF395	protein-coding	-1.24117
TPCN1	protein-coding	1.5178
RASSF2	protein-coding	2.4835
RASSF4	protein-coding	1.65126
HMMR	protein-coding	-1.2829
ESM1	protein-coding	-4.45649
U2AF1	protein-coding	-1.57934
RASSF7	protein-coding	2.15232
STEAP4	protein-coding	5.27822
DYSF	protein-coding	1.76099
MUC5AC	protein-coding	-3.67888
HES4	protein-coding	1.86816
HES2	protein-coding	4.12847
MEST	protein-coding	-3.00766
CYGB	protein-coding	-4.27508
PRC1	protein-coding	-1.1497
RBM44	protein-coding	1.78383
WDR96	protein-coding	2.82891
C19orf66	protein-coding	1.32705
ABHD4	protein-coding	-1.12232
TNFAIP8L3	protein-coding	3.88231
SGK223	protein-coding	-2.39025
PRCD	protein-coding	-2.79752
ADH1B	protein-coding	2.90106
SLC46A3	protein-coding	1.96472
PNMAL1	protein-coding	2.56905
ZSCAN31	protein-coding	-2.20622
RBM20	protein-coding	2.98646
AOC3	protein-coding	3.03537
CPPED1	protein-coding	1.19545
ZEB1	protein-coding	1.38807
SOX6	protein-coding	-1.20337
EDNRB	protein-coding	20
CHN2	protein-coding	1.82035
ARHGDIB	protein-coding	1.96686
CHN1	protein-coding	1.23438
SPC24	protein-coding	-1.31751
SPC25	protein-coding	-1.18155
LONP1	protein-coding	-1.03865
IL32	protein-coding	5.89003
CMPK2	protein-coding	4.25533
HTR1F	protein-coding	3.82891
CRISPLD2	protein-coding	-1.62161
PPM1L	protein-coding	1.09568
HTR1B	protein-coding	1.60054
TINAGL1	protein-coding	2.32909
ATHL1	protein-coding	1.74345
SAMD9	protein-coding	1.87705
IL26	protein-coding	-20
CEBPG	protein-coding	-1.32194
HELZ2	protein-coding	2.40642
HTR2A	protein-coding	20
SORD	protein-coding	-1.49771
C19orf80	protein-coding	-20
CDH15	protein-coding	2.3764
CLSTN2	protein-coding	-1.31609
FRMD4B	protein-coding	1.47103
IL11	protein-coding	-2.43921
AOX1	protein-coding	1.05809
STXBP6	protein-coding	4.03537
FOXS1	protein-coding	2.06453
IRAK3	protein-coding	1.03188
STXBP4	protein-coding	1.04561
RASL12	protein-coding	3.14685
TDRD7	protein-coding	1.13214
IRAK2	protein-coding	1.40468
LPAR2	protein-coding	2.48211
CX3CL1	protein-coding	7.56643
THEMIS2	protein-coding	1.61063
UGT8	protein-coding	3.71344
ALDH1B1	protein-coding	1.29991
NR1D2	protein-coding	-1.2385
SPARC	protein-coding	1.40501
OSBPL5	protein-coding	1.35635
SLC25A21	protein-coding	1.28835
SLC13A3	protein-coding	1.4619
SLC25A23	protein-coding	1.70701
ALDH1A3	protein-coding	-1.89604
RTP4	protein-coding	2.3764
VAV3	protein-coding	3.82891
PSRC1	protein-coding	-1.2226
LOC101927576	protein-coding	1.66191
TMEM100	protein-coding	2.58265
ACAT2	protein-coding	1.19541
MTHFD1L	protein-coding	-1.3762
IRX3	protein-coding	1.05958
FOXM1	protein-coding	-1.49425
COLGALT2	protein-coding	2.2891
CAPG	protein-coding	1.07763
TP53I11	protein-coding	1.788
SLC24A3	protein-coding	2.65572
EPHA4	protein-coding	-1.6616
EPHA5	protein-coding	-1.14243
TOX2	protein-coding	-1.64258
PDK3	protein-coding	2.91275
EPHB1	protein-coding	-2.11099
EPHB6	protein-coding	1.25047
FBXL22	protein-coding	1.3773
IL7R	protein-coding	-1.5671
SLC41A2	protein-coding	1.27143
C3orf70	protein-coding	1.59342
IRS2	protein-coding	1.08836
C16orf87	protein-coding	1.19678
CHPF	protein-coding	1.48029
PLA2G4C	protein-coding	1.2226
LIFR	protein-coding	-1.27918
APOL1	protein-coding	1.84049
APOL2	protein-coding	1.55039
FLNB	protein-coding	-2.16512
B2M	protein-coding	1.23591
CD160	protein-coding	1.4366
RFX8	protein-coding	-1.38054
C3orf52	protein-coding	2.17029
SGK1	protein-coding	-1.18182
MYO15A	protein-coding	2.22801
TSPAN2	protein-coding	2.68919
FOXO1	protein-coding	1.89498
TSPAN8	protein-coding	4.03537
TSPAN9	protein-coding	1.08937
ALPK2	protein-coding	-2.047
RTKN2	protein-coding	-1.58544
NPY2R	protein-coding	4.2984
SOD2	protein-coding	1.60057
SOD3	protein-coding	2.3426
AFAP1	protein-coding	-1.28285
KIT	protein-coding	-2.01303
DBNDD2	protein-coding	1.26773
TNFSF9	protein-coding	1.35834
PIEZO2	protein-coding	-1.46052
ENPEP	protein-coding	1.62792
ACTG2	protein-coding	3.52736
PICALM	protein-coding	1.38761
FMNL2	protein-coding	1.17346
USP53	protein-coding	1.00342
C8orf4	protein-coding	3.4504
MAP3K7CL	protein-coding	1.54351
LGR4	protein-coding	-1.05322
ISG15	protein-coding	5.1076
EDN1	protein-coding	-1.5399
GRPEL2	protein-coding	-1.0147
HIST2H2BF	protein-coding	-1.02011
ADRB2	protein-coding	-2.09392
LGMN	protein-coding	1.65998
PAQR5	protein-coding	-1.12317
THRB	protein-coding	1.17154
LONRF1	protein-coding	1.19649
ACTC1	protein-coding	4.03537
ERMN	protein-coding	-1.82959
MERTK	protein-coding	20
CLDN11	protein-coding	-3.89972
SCD	protein-coding	1.38559
STMN3	protein-coding	-2.71952
LYPD3	protein-coding	2.06136
SLC7A5	protein-coding	-3.30865
LYPD1	protein-coding	-2.28656
LYPD6	protein-coding	-2.14454
KIAA1199	protein-coding	-1.74415
SH2D4A	protein-coding	-2.8746
STMN1	protein-coding	-1.64794
USP18	protein-coding	2.68529
ACTA2	protein-coding	1.62491
HIST2H2AB	protein-coding	-1.1873
TBXAS1	protein-coding	1.77617
ANKRD6	protein-coding	1.64898
ANKRD1	protein-coding	3.70031
CHST11	protein-coding	1.06847
OVCH1	protein-coding	2.07037
LOXL3	protein-coding	1.32634
LOXL2	protein-coding	-1.14742
PRELP	protein-coding	3.73978
NUAK2	protein-coding	-1.20385
LPIN3	protein-coding	1.09479
SLC7A2	protein-coding	5.10151
IL17D	protein-coding	1.52239
SLC7A1	protein-coding	-1.0699
MMP1	protein-coding	-1.61248
MMP2	protein-coding	-1.79378
ST7	protein-coding	1.25401
TCEAL4	protein-coding	1.68542
HIST1H2BL	protein-coding	-1.31329
NRP2	protein-coding	2.63066
ACBD7	protein-coding	-3.13456
HIST1H2AJ	protein-coding	-1.06186
MOCOS	protein-coding	-1.54841
YPEL2	protein-coding	1.39807
IL12A	protein-coding	-2.5236
IL27RA	protein-coding	2.05447
IRF7	protein-coding	2.3724
IRF6	protein-coding	1.69238
IRF9	protein-coding	1.12522
CPA4	protein-coding	-2.43095
ENOX1	protein-coding	-1.36998
BIRC5	protein-coding	-1.33133
RND3	protein-coding	-1.47707
TPM2	protein-coding	1.51806
NRXN3	protein-coding	1.49026
BIRC3	protein-coding	1.5864
TAGLN	protein-coding	1.39934
FGFR3	protein-coding	1.90983
FRMD5	protein-coding	1.38627
EFHD1	protein-coding	2.46413
PTPDC1	protein-coding	1.14771
REC8	protein-coding	1.50544
LOC102724141	protein-coding	5.25776
ZNF474	protein-coding	3.15401
LAMA5	protein-coding	4.07087
PSD4	protein-coding	3.76319
PSD3	protein-coding	-2.22157
LAMA3	protein-coding	1.08017
LAMA2	protein-coding	2.05778
MAD2L1	protein-coding	-1.36499
GUCY1A3	protein-coding	2.70349
GUCY1A2	protein-coding	1.42213
STK38L	protein-coding	3.27373
OPHN1	protein-coding	1.01352
SEC16B	protein-coding	1.02307
TAPBP	protein-coding	1.33094
LSM11	protein-coding	1.23493
TSPAN13	protein-coding	2.03537
TSPAN15	protein-coding	2.92684
GPM6B	protein-coding	2.02965
KLF8	protein-coding	1.12106
GLTSCR2	protein-coding	-1.13742
KLF5	protein-coding	1.87571
DDIT4	protein-coding	-1.80985
CYB5R3	protein-coding	1.09461
NREP	protein-coding	1.69822
KIAA0101	protein-coding	-1.61984
NRG1	protein-coding	-2.7685
NCALD	protein-coding	1.52378
NETO2	protein-coding	-1.59399
B3GALT4	protein-coding	1.87098
HMOX1	protein-coding	-2.13429
RELB	protein-coding	1.8739
B3GALT1	protein-coding	1.57427
RASA4	protein-coding	1.61986
CADM1	protein-coding	-3.81724
GRPR	protein-coding	-2.95899
RASD1	protein-coding	1.53057
TMOD2	protein-coding	-1.05069
TMOD1	protein-coding	1.76074
CD82	protein-coding	1.1356
C5AR2	protein-coding	1.45337
C5AR1	protein-coding	2.77331
IGF2BP3	protein-coding	-1.05012
IGF2BP1	protein-coding	1.24243
GGT5	protein-coding	1.53132
NDC80	protein-coding	-1.17487
PEAR1	protein-coding	1.17509
CD93	protein-coding	4.40149
NCAM1	protein-coding	-1.76553
CD97	protein-coding	1.03083
GUCY1B3	protein-coding	1.44768
PCSK7	protein-coding	1.39684
PCSK9	protein-coding	2.36726
C7orf63	protein-coding	-1.60088
C7orf65	protein-coding	20
SERPINB2	protein-coding	-4.59945
C7orf69	protein-coding	1.31363
ANKH	protein-coding	1.77371
CYP19A1	protein-coding	2.82891
VSIG10L	protein-coding	1.32487
PCGF5	protein-coding	1.25061
CYS1	protein-coding	2.4504
VWA5A	protein-coding	-1.20273
CYP26B1	protein-coding	4.79761
OSBPL10	protein-coding	1.56772
A2M	protein-coding	3.84781
PCK2	protein-coding	-2.0354
COL14A1	protein-coding	1.60983
SERPINE2	protein-coding	-1.74495
SLC25A5	protein-coding	-1.19189
SLC25A6	protein-coding	-2.40645
PSPH	protein-coding	-1.85629
BACE2	protein-coding	1.34009
DYNC1I1	protein-coding	1.5402
TIGD2	protein-coding	-1.26621
BOLL	protein-coding	4.58791
ADAMTSL1	protein-coding	-1.10701
SERPING1	protein-coding	1.53144
ADAMTSL4	protein-coding	1.22353
ADAMTSL5	protein-coding	1.18619
SLC26A10	protein-coding	2.54351
LANCL3	protein-coding	2.15401
ATP2A3	protein-coding	-2.85135
CNTN4	protein-coding	3.18737
SALL2	protein-coding	-2.64091
CNTN3	protein-coding	1.45878
CD276	protein-coding	1.13688
RERG	protein-coding	20
CRIP1	protein-coding	3.19572
CRIP2	protein-coding	2.59405
NCAPD2	protein-coding	-1.08036
CBLB	protein-coding	-1.08997
ANO4	protein-coding	1.48541
BACH2	protein-coding	-3.26788
WARS	protein-coding	-1.79804
SV2A	protein-coding	-1.0772
ANO1	protein-coding	3.60491
SERPINI1	protein-coding	2.00294
FMO5	protein-coding	1.54756
FMO2	protein-coding	4.41388
FMO3	protein-coding	3.66644
MLLT11	protein-coding	1.3598
DHX58	protein-coding	1.84687
COL5A1	protein-coding	1.3615
COL5A2	protein-coding	1.37891
FMN2	protein-coding	-1.45088
JAKMIP2	protein-coding	2.03537
ABCA8	protein-coding	-2.78991
ABCA9	protein-coding	-1.97106
TOP2A	protein-coding	-1.5295
LOC102724428	protein-coding	2.2984
ABCA3	protein-coding	1.24903
ABCA13	protein-coding	2.09978
SCN5A	protein-coding	4.12847
SPON2	protein-coding	1.48116
DAB2IP	protein-coding	2.00676
BMF	protein-coding	1.51453
TYMP	protein-coding	3.57633
AQP1	protein-coding	2.07169
TYMS	protein-coding	-1.15743
LYPD6B	protein-coding	-3.46738
TM4SF20	protein-coding	-2.66002
SCARA3	protein-coding	-1.26882
C10orf111	protein-coding	-2.15693
SCARF2	protein-coding	1.03118
GBP3	protein-coding	1.11922
CSF1	protein-coding	1.30732
GBP1	protein-coding	1.13353
SCN8A	protein-coding	-1.28056
MMP19	protein-coding	1.74909
TTC39A	protein-coding	1.4031
MMP11	protein-coding	1.97246
SCN9A	protein-coding	1.54327
HRCT1	protein-coding	1.69922
HCK	protein-coding	3.99354
PBK	protein-coding	-1.56323
KIF20A	protein-coding	-2.0983
PARP9	protein-coding	2.40452
GPC4	protein-coding	2.63288
LYVE1	protein-coding	3.8798
VAMP7	protein-coding	-1.19763
QPRT	protein-coding	2.84297
S100A4	protein-coding	1.29495
DPF3	protein-coding	-2.54823
APLP1	protein-coding	1.07635
KIAA0895	protein-coding	1.3764
CAMK1D	protein-coding	1.30653
CXCL11	protein-coding	20
CXCL12	protein-coding	-2.49017
ANKDD1B	protein-coding	3.55474
HCN3	protein-coding	2.06707
L3MBTL4	protein-coding	2.32112
CXCL10	protein-coding	20
DDX60L	protein-coding	1.79908
TRIM47	protein-coding	2.18073
GJB3	protein-coding	3.06707
MYADM	protein-coding	1.55448
PSAT1	protein-coding	-4.33506
TMTC1	protein-coding	1.62412
PGP	protein-coding	1.09418
KANK1	protein-coding	1.02968
L3MBTL3	protein-coding	1.31727
MUC19	protein-coding	20
ATP6V0E2	protein-coding	-1.1219
TRIM36	protein-coding	4.52079
GJA4	protein-coding	6.06511
NUDT10	protein-coding	-2.61403
ZFP92	protein-coding	2.42126
NUDT11	protein-coding	-1.36412
HGF	protein-coding	-2.0163
STON1-GTF2A1L	protein-coding	1.53739
TRIM69	protein-coding	1.31008
BICD1	protein-coding	1.02354
ICAM1	protein-coding	3.14763
PAX9	protein-coding	1.69338
SYT11	protein-coding	-1.69697
SYT16	protein-coding	2.67654
PLD1	protein-coding	-1.30619
AFAP1L1	protein-coding	1.65982
DGKB	protein-coding	2.4504
WNT5A	protein-coding	-1.11267
DGKI	protein-coding	1.2333
TNFAIP3	protein-coding	1.36046
TNFAIP2	protein-coding	1.14733
NUDT6	protein-coding	-1.33002
NQO1	protein-coding	-3.46516
ALS2CL	protein-coding	1.43858
C14orf80	protein-coding	1.34284
BEX1	protein-coding	-1.95101
OXTR	protein-coding	1.79905
ZFP36	protein-coding	1.20607
PDGFD	protein-coding	1.39475
TNFSF15	protein-coding	-4.07068
PDGFC	protein-coding	-1.37775
PAFAH1B3	protein-coding	-1.63337
RALGPS2	protein-coding	-2.71207
PLAT	protein-coding	1.69003
PIP	protein-coding	5.12847
PECAM1	protein-coding	2.98646
TNFSF10	protein-coding	2.77233
C11orf87	protein-coding	-3.00081
GTSE1	protein-coding	-1.07687
PKP4	protein-coding	-1.18184
PKLR	protein-coding	2.66453
GRIA1	protein-coding	2.35087
SEL1L2	protein-coding	20
RIMS1	protein-coding	1.53197
SEL1L3	protein-coding	-1.70311
RIMS3	protein-coding	-1.72397
UPK1B	protein-coding	1.97647
ANGPTL4	protein-coding	1.77338
ANGPTL6	protein-coding	1.44785
NHLRC3	protein-coding	1.18868
C11orf91	protein-coding	-1.53449
C11orf96	protein-coding	3.60916
CERCAM	protein-coding	1.39902
ACSS3	protein-coding	-1.20932
LRRN4CL	protein-coding	-3.09392
SORT1	protein-coding	1.56066
KIAA1524	protein-coding	-1.36936
CSTA	protein-coding	-2.59945
KCNMB1	protein-coding	1.18352
GPR17	protein-coding	1.10795
ST6GAL2	protein-coding	20
PTK2	protein-coding	1.06928
SMURF2	protein-coding	-1.77896
VLDLR	protein-coding	-2.43421
PTN	protein-coding	-1.53611
TRIM16	protein-coding	-1.11111
ANKRD33B	protein-coding	-1.04219
TRIM14	protein-coding	1.27954
ANKS1B	protein-coding	1.94664
C10orf10	protein-coding	2.6399
IQGAP3	protein-coding	-1.27468
TRIM21	protein-coding	1.37948
COX7A1	protein-coding	1.16286
TRIM22	protein-coding	1.16802
DDR1	protein-coding	1.09994
RAB11FIP1	protein-coding	2.30801
CD9	protein-coding	1.5727
TXNIP	protein-coding	-1.36398
COL8A1	protein-coding	2.13902
CST1	protein-coding	-3.67888
CST3	protein-coding	1.15519
CST2	protein-coding	-20
CHSY3	protein-coding	1.44731
PDGFRL	protein-coding	2.18531
PRKAB2	protein-coding	1.04777
SQLE	protein-coding	1.33563
GOT1	protein-coding	-1.23262
GPR63	protein-coding	1.83474
GAS1	protein-coding	1.94986
PARM1	protein-coding	4.07081
C9orf170	protein-coding	2.39151
PRKAA2	protein-coding	2.22064
SP110	protein-coding	2.83413
GSN	protein-coding	1.08963
MRVI1	protein-coding	2.26404
GPR56	protein-coding	-1.95899
WDFY3	protein-coding	1.13387
LRRN3	protein-coding	1.89715
SLC26A6	protein-coding	1.75273
BOLA2B	protein-coding	-2.87153
LUZP2	protein-coding	1.74515
PHKA1	protein-coding	3.01326
EXOSC8	protein-coding	-1.07706
AURKA	protein-coding	-1.55425
EXOSC6	protein-coding	-1.23193
C11orf35	protein-coding	20
TMPO	protein-coding	-1.05171
SMAD3	protein-coding	-2.07665
ZDHHC14	protein-coding	1.31417
LGI4	protein-coding	3.1619
ENPP2	protein-coding	1.54219
ITIH3	protein-coding	2.64305
MFGE8	protein-coding	1.55255
CERS6	protein-coding	1.58775
PPARGC1A	protein-coding	-1.97586
SLX4IP	protein-coding	1.35486
CSRP2	protein-coding	1.592
AGRN	protein-coding	1.94656
LOC101928548	protein-coding	1.79144
SFRP4	protein-coding	-1.80044
DHRS7B	protein-coding	1.04996
TMEM30B	protein-coding	2.16032
DYNC2H1	protein-coding	-1.20057
TNFRSF10A	protein-coding	1.34779
C9orf131	protein-coding	1.29075
TNFRSF10D	protein-coding	-1.58959
NUP210	protein-coding	-1.44526
KIAA0040	protein-coding	3.40481
RNF128	protein-coding	1.58454
SHC4	protein-coding	3.8023
SLC16A12	protein-coding	3.18737
EVA1A	protein-coding	-1.62471
THSD7B	protein-coding	-4.82572
ID3	protein-coding	1.0565
NLRP10	protein-coding	-1.09265
GK	protein-coding	-1.09077
AK4	protein-coding	1.99419
CTDSPL	protein-coding	1.05985
SSBP2	protein-coding	1.04319
DOK6	protein-coding	1.07059
FSTL3	protein-coding	1.64154
TFPI	protein-coding	-1.28606
ETV1	protein-coding	1.22752
GPR156	protein-coding	2.24395
RNF115	protein-coding	1.02541
DNAJA4	protein-coding	1.16032
AGT	protein-coding	2.7659
RCSD1	protein-coding	2.86832
PRR11	protein-coding	-1.74906
NDRG1	protein-coding	-1.3668
RSAD2	protein-coding	6.3034
DNAJB4	protein-coding	1.89226
FBXO6	protein-coding	1.40499
GRB14	protein-coding	2.3117
LOC102723625	protein-coding	1.43514
SLIT3	protein-coding	1.49638
PRR24	protein-coding	1.50116
RAB15	protein-coding	1.93083
DCLK1	protein-coding	-1.22795
GALM	protein-coding	-1.24349
CCDC67	protein-coding	1.77233
CCDC68	protein-coding	2.65685
ZNF385A	protein-coding	1.33428
AMELX	protein-coding	2.19886
STON1	protein-coding	1.24357
AIM1	protein-coding	1.35428
POPDC2	protein-coding	3.22092
POPDC3	protein-coding	-1.17578
C6	protein-coding	20
C3	protein-coding	5.02156
RNF152	protein-coding	1.97341
SYNDIG1	protein-coding	-3.57197
TSC22D3	protein-coding	2.90194
NFKB2	protein-coding	1.15335
FAM46B	protein-coding	2.23653
KIAA0226L	protein-coding	1.47243
SCML1	protein-coding	1.07078
EPSTI1	protein-coding	2.37391
MYOZ1	protein-coding	4.4504
MYOZ2	protein-coding	3.02795
OR51E2	protein-coding	4.8564
OR51E1	protein-coding	20
NGEF	protein-coding	1.62728
IL8	protein-coding	5.13089
GYG2	protein-coding	-1.81404
ODF3B	protein-coding	3.30567
CRLF1	protein-coding	1.45659
IGH	protein-coding	5.11803
EEPD1	protein-coding	1.53346
FGF10	protein-coding	-20
LEPR	protein-coding	1.91305
SAMHD1	protein-coding	2.49099
DPYSL3	protein-coding	1.39562
SLFN13	protein-coding	1.44214
SLCO3A1	protein-coding	1.27253
EDA2R	protein-coding	-1.16266
PAPPA2	protein-coding	-4.74963
STOX1	protein-coding	2.36551
ARHGAP6	protein-coding	2.16653
CLIC3	protein-coding	2.71344
CLIC6	protein-coding	3.21594
ABHD12B	protein-coding	2.17287
CYTIP	protein-coding	-20
FAM43A	protein-coding	-2.82298
LY6E	protein-coding	1.99078
GPR112	protein-coding	20
GPR116	protein-coding	20
LY6K	protein-coding	-3.04145
ADM	protein-coding	-1.56063
PRR5L	protein-coding	1.85003
P4HA3	protein-coding	1.2962
KIF18A	protein-coding	-1.6514
CHST2	protein-coding	2.72822
ACE	protein-coding	1.8168
IDI1	protein-coding	1.19344
ADA	protein-coding	-1.15107
GRHL1	protein-coding	3.2984
FAM159B	protein-coding	20
SLC9C1	protein-coding	5.58791
CHST6	protein-coding	2.00294
KIF14	protein-coding	-1.39699
XK	protein-coding	2.28048
KIF11	protein-coding	-1.15616
GCNT4	protein-coding	-1.08997
FKBP5	protein-coding	4.69674
SULF1	protein-coding	2.27797
SIPA1L2	protein-coding	-2.48563
IFI44L	protein-coding	5.57252
NPTX1	protein-coding	-3.20103
ISM1	protein-coding	2.28994
ISLR	protein-coding	1.4504
OPN3	protein-coding	1.16556
HAS3	protein-coding	1.84357
HAS2	protein-coding	-2.18563
GYPC	protein-coding	-1.18335
NPTXR	protein-coding	1.09695
AHNAK2	protein-coding	1.1346
PLK2	protein-coding	-1.68194
PLK1	protein-coding	-1.98237
BDNF	protein-coding	-2.97233
SPTB	protein-coding	4.04042
LYNX1	protein-coding	1.29254
GPT2	protein-coding	-1.10083
ADARB1	protein-coding	2.50779
ATP10A	protein-coding	2.5185
FNBP1L	protein-coding	2.8136
RSPO1	protein-coding	3.17287
BMP6	protein-coding	1.57593
HSD17B6	protein-coding	1.66904
HSD17B7	protein-coding	1.28195
FGF5	protein-coding	-1.96958
TRAF1	protein-coding	2.04538
FGF2	protein-coding	-1.29172
BMP1	protein-coding	1.38301
TRIM7	protein-coding	1.58454
BMP2	protein-coding	4.26409
BMP4	protein-coding	-1.18377
CRABP2	protein-coding	3.30285
PTTG1	protein-coding	-1.99574
PTTG2	protein-coding	20
INSIG1	protein-coding	1.34349
COL7A1	protein-coding	2.99797
NTRK2	protein-coding	2.33052
PARPBP	protein-coding	-1.24113
RANBP3L	protein-coding	5.42126
GPX3	protein-coding	1.10568
GPX7	protein-coding	1.38756
SEC14L2	protein-coding	1.61828
GRIN2A	protein-coding	-3.01837
FGD5	protein-coding	4.21594
FGD4	protein-coding	1.59692
GIPR	protein-coding	2.04274
ARHGAP35	protein-coding	-1.25182
FOSB	protein-coding	1.9516
MYH3	protein-coding	2.4504
OCIAD2	protein-coding	1.26865
C1R	protein-coding	1.06335
C1S	protein-coding	1.23876
ARHGAP28	protein-coding	-1.51198
KIAA1456	protein-coding	1.43893
OCA2	protein-coding	20
LURAP1L	protein-coding	-1.01122
RHBDL2	protein-coding	1.2305
SEPT5	protein-coding	1.99206
APOD	protein-coding	3.82035
APOB	protein-coding	6.33141
KIF4A	protein-coding	-1.45649
NUSAP1	protein-coding	-1.14288
HMGA1	protein-coding	-2.28233
RNF213	protein-coding	1.13434
ABCC9	protein-coding	-1.68701
MYOM3	protein-coding	20
MYOM1	protein-coding	3.44206
ARHGAP10	protein-coding	1.38663
TIMP4	protein-coding	4.1629
EBF3	protein-coding	-1.88697
EBF2	protein-coding	-1.05117
SHMT2	protein-coding	-1.16367
ARRDC2	protein-coding	1.62673
YARS	protein-coding	-1.26413
HHIPL1	protein-coding	1.19151
SEPT6	protein-coding	1.36077
SEPT8	protein-coding	1.10794
MGAM	protein-coding	1.41493
AHRR	protein-coding	-1.74191
RAB6B	protein-coding	1.14837
ANTXR1	protein-coding	1.14849
KIF2C	protein-coding	-1.2567
PLAC4	protein-coding	1.97477
DEPDC1	protein-coding	-1.59231
GRAMD3	protein-coding	1.41813
PLAC9	protein-coding	1.27714
TMEM215	protein-coding	-20
TNS1	protein-coding	1.38721
SEPW1	protein-coding	1.09045
TET1	protein-coding	1.69407
TIAM1	protein-coding	-1.2094
EIF2AK2	protein-coding	1.31574
KIF23	protein-coding	-1.02075
NFIA	protein-coding	1.55553
PALLD	protein-coding	1.92293
NGF	protein-coding	-1.72397
SH3BP1	protein-coding	-1.80699
G0S2	protein-coding	-6.55803
SBSN	protein-coding	-2.49301
GUCY2C	protein-coding	1.97647
CHAC1	protein-coding	-2.50948
AACS	protein-coding	1.00397
COBLL1	protein-coding	2.23873
CDCA3	protein-coding	-1.61808
CAPN9	protein-coding	2.58791
ACOT12	protein-coding	-1.73942
CDCA2	protein-coding	-1.10643
FABP3	protein-coding	2.61661
CAPN3	protein-coding	1.52702
CDCA8	protein-coding	-1.30116
CDCA7	protein-coding	-1.39926
PLEKHN1	protein-coding	1.74318
TSLP	protein-coding	-2.52062
RSPH3	protein-coding	1.04328
TMEM71	protein-coding	-3.67888
CACNA2D3	protein-coding	-2.15693
PPP1R12B	protein-coding	1.00575
ATG16L2	protein-coding	1.55846
BDKRB2	protein-coding	-3.33096
BDKRB1	protein-coding	-5.70442
ROR1	protein-coding	1.44425
NDN	protein-coding	-1.55665
NCR3LG1	protein-coding	1.02789
COL27A1	protein-coding	1.9083
BST2	protein-coding	7.70338
GLDN	protein-coding	6.88821
TMEM54	protein-coding	-1.18121
GDF5	protein-coding	-3.45649
GDF6	protein-coding	-1.95318
TCN2	protein-coding	1.67988
PPP1R17	protein-coding	-2.08098
CTNND2	protein-coding	-3.58773
GABRE	protein-coding	-1.44766
SESN2	protein-coding	-1.78822
PHEX	protein-coding	-1.65812
SESN3	protein-coding	1.71207
RPS16	protein-coding	-1.14919
ABI3BP	protein-coding	-1.24606
PDLIM3	protein-coding	3.05739
GTF2A1L	protein-coding	2.2984
MOB3B	protein-coding	2.19886
PLEKHH2	protein-coding	1.16595
ZNF704	protein-coding	2.52214
SCGB3A2	protein-coding	5.3764
IKZF2	protein-coding	1.85421
PLEKHG3	protein-coding	1.1823
FURIN	protein-coding	1.07049
PLEKHG5	protein-coding	1.61126
RORA	protein-coding	1.48515
HMCN1	protein-coding	-1.48024
PLA2R1	protein-coding	2.27221
ZSWIM4	protein-coding	1.55386
SEMA3E	protein-coding	2.34053
DMPK	protein-coding	1.06261
SEMA3A	protein-coding	-4.06856
SEMA3D	protein-coding	-3.254
ASNS	protein-coding	-3.11045
ADRA1D	protein-coding	-4.11945
SEMA4A	protein-coding	1.86544
ADRA1B	protein-coding	1.83403
IGSF10	protein-coding	3.19994
CDR1	protein-coding	1.25977
ASPM	protein-coding	-1.57128
P2RY6	protein-coding	2.10423
TRIB3	protein-coding	-2.18553
P2RY2	protein-coding	1.97647
ASPN	protein-coding	4.62246
ITPRIP	protein-coding	-1.03172
GDNF	protein-coding	-1.11457
TCEA1	protein-coding	-1.3962
SEMA6D	protein-coding	-1.83634
LRP2BP	protein-coding	1.0137
P2RX5	protein-coding	3.06707
FILIP1	protein-coding	3.09195
FAM205A	protein-coding	2.51314
AKAP13	protein-coding	1.07493
HIP1	protein-coding	2.33755
MYC	protein-coding	-1.0068
PTGER3	protein-coding	1.54351
SOCS2	protein-coding	-2.7885
SOCS3	protein-coding	-1.16639
LEFTY2	protein-coding	20
MITF	protein-coding	1.28552
ITGAV	protein-coding	1.45631
RAVER2	protein-coding	1.29406
WISP2	protein-coding	-1.31304
ENDOD1	protein-coding	1.30533
SCD5	protein-coding	1.61071
MARCH2	protein-coding	1.0848
JAM2	protein-coding	1.69174
JAM3	protein-coding	1.10675
BCAM	protein-coding	-1.45649
ITGA1	protein-coding	1.69394
ITGA3	protein-coding	1.16151
ITGA9	protein-coding	2.15232
ITGA5	protein-coding	2.50949
ITGA7	protein-coding	2.35779
KLHL3	protein-coding	2.07639
CKS1B	protein-coding	-1.17895
SHROOM3	protein-coding	1.33353
ITGB8	protein-coding	-1.21363
SCG2	protein-coding	1.36234
AASS	protein-coding	-1.089
MARCKS	protein-coding	-1.08744
AARS	protein-coding	-1.07874
TENM4	protein-coding	1.72839
NTM	protein-coding	-1.21249
CDKN3	protein-coding	-2.12604
BBOX1	protein-coding	-3.26384
SKA3	protein-coding	-1.39799
MTHFD2	protein-coding	-1.40499
SLC1A1	protein-coding	1.2923
PRRG4	protein-coding	4.12847
LEPREL4	protein-coding	1.02677
SLC1A5	protein-coding	-2.15668
CTHRC1	protein-coding	1.90541
CDK1	protein-coding	-1.07798
NRK	protein-coding	2.76074
SLC38A11	protein-coding	4.82891
SLC17A7	protein-coding	1.91607
SLC17A9	protein-coding	1.06988
PKDCC	protein-coding	1.57126
STARD4	protein-coding	1.19389
STARD8	protein-coding	-2.08876
TNNI3K	protein-coding	3.06707
RASGEF1B	protein-coding	2.89098
MAOA	protein-coding	1.97086
STAT2	protein-coding	1.02612
IFI6	protein-coding	6.07629
PDE11A	protein-coding	4.58791
SLC20A2	protein-coding	1.21114
ELN	protein-coding	-2.39471
PDE10A	protein-coding	1.39382
STAT4	protein-coding	-1.75988
MAP2	protein-coding	2.92645
LGALSL	protein-coding	1.70281
NOD2	protein-coding	4.2984
BCL6	protein-coding	1.16558
PCDH7	protein-coding	2.15348
SLC22A13	protein-coding	1.4504
PCDH9	protein-coding	2.07467
HIP1R	protein-coding	1.89081
CDH6	protein-coding	-1.02001
PCDH1	protein-coding	2.16445
LGALS9	protein-coding	2.67988
GSTT2	protein-coding	3.06707
CSPG4	protein-coding	2.61783
OLFML2A	protein-coding	2.42731
EOGT	protein-coding	1.16735
FHL2	protein-coding	-1.23359
MYH11	protein-coding	4.54118
NTNG1	protein-coding	-2.53204
FHL5	protein-coding	20
GALNT10	protein-coding	1.05601
INPP4B	protein-coding	4.63563
FHL1	protein-coding	1.14515
EIF4EBP1	protein-coding	-1.89259
GALNT15	protein-coding	-2.59114
GALNT18	protein-coding	3.35628
MARS	protein-coding	-1.23907
HMGCS1	protein-coding	2.3158
RFTN2	protein-coding	1.78185
HIST1H4D	protein-coding	-1.10328
TLDC2	protein-coding	2.58791
HIST1H4F	protein-coding	-1.48906
BHLHE41	protein-coding	1.98092
HIST1H4B	protein-coding	-1.31049
HIST1H4A	protein-coding	-1.58354
MTMR11	protein-coding	1.06259
SH2B3	protein-coding	-1.01653
PTK2B	protein-coding	2.26105
MYLK	protein-coding	1.23778
HIST1H3A	protein-coding	-1.24236
BHLHE40	protein-coding	1.19382
TRPC4	protein-coding	-1.79631
TRPC6	protein-coding	1.59359
HPSE	protein-coding	-1.54138
CCDC158	protein-coding	2.18551
DUSP1	protein-coding	1.28632
LDB3	protein-coding	1.66595
LDB2	protein-coding	-2.88783
SPOCK1	protein-coding	-1.41687
RSL24D1	protein-coding	-1.32388
NEFL	protein-coding	-20
NEFM	protein-coding	-5.87995
GK5	protein-coding	1.25215
EID3	protein-coding	-2.39509
SNAP91	protein-coding	2.58791
RIPK3	protein-coding	1.60847
STYK1	protein-coding	-2.99491
PRSS35	protein-coding	2.41193
CDKN2C	protein-coding	-1.13366
CDKN2B	protein-coding	2.04189
MKI67	protein-coding	-1.30314
DLX2	protein-coding	-1.49105
KRTAP1-5	protein-coding	-1.02152
DLX1	protein-coding	-1.08452
TRABD2A	protein-coding	-2.19345
GNG11	protein-coding	-1.6883
RGS7BP	protein-coding	4.2984
NT5DC3	protein-coding	1.85909
PLCE1	protein-coding	1.13102
MYO7B	protein-coding	1.60185
DHCR7	protein-coding	1.42275
IFIH1	protein-coding	3.36653
SYNM	protein-coding	2.14513
FAM64A	protein-coding	-1.97389
THBS3	protein-coding	1.42828
CCDC141	protein-coding	20
TLR2	protein-coding	2.27532
TLR4	protein-coding	1.02908
LMCD1	protein-coding	1.89894
PLCD1	protein-coding	1.11836
MICALCL	protein-coding	1.79901
TFPI2	protein-coding	-2.64705
LRRC15	protein-coding	-1.15498
PAMR1	protein-coding	-1.93503
PARP10	protein-coding	1.2541
SYN2	protein-coding	3.75651
PARP14	protein-coding	1.86279
PARP12	protein-coding	2.11183
GEM	protein-coding	1.4811
PLCB4	protein-coding	-1.51763
TRANK1	protein-coding	1.226
BUB1B	protein-coding	-1.26212
DDX58	protein-coding	3.0416
NEBL	protein-coding	4.69833
SLC7A11	protein-coding	-3.72708
LRRC32	protein-coding	1.44074
SLC7A14	protein-coding	-6.15693
HLA-B	protein-coding	1.10909
HLA-C	protein-coding	1.05442
ADAMTS7	protein-coding	1.63346
ADAMTS6	protein-coding	-1.62043
HLA-F	protein-coding	1.62688
ADAMTS9	protein-coding	1.18334
ADAMTS4	protein-coding	1.69814
DDX60	protein-coding	1.98523
KPNA2	protein-coding	-1.04209
BUB1	protein-coding	-1.19579
TMEM150C	protein-coding	2.04601
STAB2	protein-coding	2.72938
UBE2C	protein-coding	-1.21154
SMOC1	protein-coding	2.01383
KIAA1671	protein-coding	1.49552
SLC3A2	protein-coding	-1.78466
UBE2S	protein-coding	-1.43281
HERC6	protein-coding	4.42298
SNTG2	protein-coding	-4.00081
METTL7A	protein-coding	1.82086
TMEM200A	protein-coding	-1.37255
IFITM2	protein-coding	1.32425
OAS2	protein-coding	4.6572
IFITM1	protein-coding	4.72941
OAS1	protein-coding	7.48456
IFITM3	protein-coding	1.72583
OAS3	protein-coding	5.16022
DLGAP5	protein-coding	-1.66525
LTBP1	protein-coding	1.61744
STAC3	protein-coding	-1.83642
PLCL1	protein-coding	2.27532
MID2	protein-coding	1.01811
MID1	protein-coding	-1.10207
OASL	protein-coding	3.77676
SUSD2	protein-coding	1.9735
SNTB1	protein-coding	-2.23971
CCDC110	protein-coding	1.59082
NEK2	protein-coding	-1.85558
HJURP	protein-coding	-1.0795
PITPNC1	protein-coding	-2.5603
ZCCHC2	protein-coding	1.15447
MRAP2	protein-coding	3.6781
UCN2	protein-coding	3.51262
ABL1	protein-coding	-1.37158
CITED2	protein-coding	-1.00919
SAV1	protein-coding	-1.08405
SUSD5	protein-coding	1.57969
CCDC129	protein-coding	-1.84115
TSEN15	protein-coding	-1.04522
MAPRE2	protein-coding	1.1148
ACPL2	protein-coding	1.53894
CCDC107	protein-coding	1.30297
GCLM	protein-coding	-1.35129
SYT7	protein-coding	-3.72951
GINS2	protein-coding	-1.22351
MCTP1	protein-coding	2.25317
GP1BB	protein-coding	1.97647
EIF3F	protein-coding	-1.13297
PFKFB4	protein-coding	2.41268
ARL4C	protein-coding	-2.02166
FNDC1	protein-coding	1.94768
ARSI	protein-coding	-1.92464
TP53INP2	protein-coding	1.20407
ARSB	protein-coding	1.18862
MCTP2	protein-coding	1.3724
PLSCR1	protein-coding	2.17347
ART3	protein-coding	3.4504
ENC1	protein-coding	1.31571
PPAP2A	protein-coding	1.39595
NHSL2	protein-coding	-1.22742
VTN	protein-coding	-2.08098
CCL5	protein-coding	3.4504
CLMN	protein-coding	3.50615
CLMP	protein-coding	-2.45518
PLEKHA5	protein-coding	-1.42621
CCL2	protein-coding	-1.38676
ZNF521	protein-coding	-1.723
C1QTNF1	protein-coding	3.009
FST	protein-coding	-3.40903
C1QTNF2	protein-coding	1.73853
C1QTNF5	protein-coding	2.01497
C1QTNF8	protein-coding	20
SLITRK4	protein-coding	3.92643
DNASE1L1	protein-coding	1.07651
ABRA	protein-coding	3.57142
RCAN2	protein-coding	1.82165
RCAN3	protein-coding	1.07984
LCP1	protein-coding	2.03994
TLE2	protein-coding	4.6096
ZNF503	protein-coding	1.11114
RIN1	protein-coding	-1.06749
XAF1	protein-coding	2.08532
IFIT5	protein-coding	1.00414
WFDC1	protein-coding	1.83079
IFIT1	protein-coding	5.05047
IFIT2	protein-coding	3.21989
IFIT3	protein-coding	3.22156
NMT2	protein-coding	-1.51995
TRPV2	protein-coding	1.13325
S1PR3	protein-coding	1.02795
BTG2	protein-coding	1.05359
NR4A1	protein-coding	1.3048
DMKN	protein-coding	-2.43921
NR4A2	protein-coding	-1.27637
NR4A3	protein-coding	-1.34976
FRY	protein-coding	3.01765
FKBP1B	protein-coding	2.53447
LOC101928841	protein-coding	5.02387
FOS	protein-coding	1.5089
MYO1D	protein-coding	1.24154
UNC13A	protein-coding	1.21141
PPP1R13L	protein-coding	2.39645
SLC51B	protein-coding	3.82891
MZT1	protein-coding	-1.03333
FCRLA	protein-coding	-1.81012
CUBN	protein-coding	1.42126
FCRLB	protein-coding	-2.08098
PPP1R14A	protein-coding	2.33803
PPP1R14C	protein-coding	2.12847
KITLG	protein-coding	-1.42536
SLC29A2	protein-coding	1.97396
SORBS1	protein-coding	4.62525
COL10A1	protein-coding	1.36699
ST3GAL5	protein-coding	-1.45247
LGALS3BP	protein-coding	1.20464
PDIA5	protein-coding	1.03448
ARHGAP11A	protein-coding	-1.29975
DUSP26	protein-coding	3.12847
BCAT1	protein-coding	-1.17282
ACAN	protein-coding	1.43398
DPY19L2	protein-coding	1.27954
TLL1	protein-coding	-1.97844
TAS2R1	protein-coding	3.4504
FAM129A	protein-coding	-1.66793
MT1X	protein-coding	1.60421
TCF4	protein-coding	1.04652
MT1M	protein-coding	3.17287
COL1A1	protein-coding	1.67101
ASB2	protein-coding	1.32689
COL1A2	protein-coding	1.54486
PCOLCE2	protein-coding	1.93583
MEGF6	protein-coding	1.02817
MT2A	protein-coding	1.28693
COL9A2	protein-coding	1.42546
TRPM3	protein-coding	1.71344
C5orf46	protein-coding	4.8564
SYBU	protein-coding	-1.63529
CALCRL	protein-coding	3.7985
DTYMK	protein-coding	-1.06888
TPPP3	protein-coding	3.17684
EHD1	protein-coding	1.19761
SNCAIP	protein-coding	4.48317
DHRS3	protein-coding	-3.92417
CARD6	protein-coding	1.1861
PHLDA1	protein-coding	-1.78607
OMD	protein-coding	4.64044
TUBB2A	protein-coding	1.53524
SULT1B1	protein-coding	4.87571
KCNB1	protein-coding	1.56079
TROAP	protein-coding	-1.36262
SAMD9L	protein-coding	2.07084
ANGPT4	protein-coding	3.2984
KCND3	protein-coding	-2.56879
CYB561	protein-coding	1.35834
CASP12	protein-coding	4.12847
VDR	protein-coding	-1.03022
SLMAP	protein-coding	1.01144
PLXDC2	protein-coding	2.33813
PLXDC1	protein-coding	2.06707
SPARCL1	protein-coding	5.98383
COL4A5	protein-coding	2.4619
COL4A2	protein-coding	1.32387
COL4A1	protein-coding	1.69241
DBI	protein-coding	1.09962
IQCK	protein-coding	1.24137
TAP1	protein-coding	1.29246
CSRNP3	protein-coding	3.60652
MATN3	protein-coding	1.52702
DIXDC1	protein-coding	1.47307
HOPX	protein-coding	3.36948
NCKAP5	protein-coding	-2.53014
PPARG	protein-coding	1.04491
HS3ST3B1	protein-coding	-1.5634
PPIC	protein-coding	1.10511
DTX3L	protein-coding	1.46123
ANKEF1	protein-coding	1.40858
KCTD12	protein-coding	-2.37484
KCTD16	protein-coding	-4.75561
MLKL	protein-coding	1.34992
SLC44A1	protein-coding	1.04913
SLC44A2	protein-coding	1.30587
KCNK1	protein-coding	2.41388
KCNK2	protein-coding	-1.01661
KCNJ6	protein-coding	1.06606
KCNJ2	protein-coding	-1.71952
ENTPD7	protein-coding	1.02549
ZC3H12A	protein-coding	1.56759
FADS2	protein-coding	1.95806
DENND2C	protein-coding	1.18677
NRCAM	protein-coding	1.65572
DENND2A	protein-coding	2.40149
TC2N	protein-coding	3.19886
CDHR4	protein-coding	3.82891
RHOD	protein-coding	2.10309
CDHR1	protein-coding	2.04101
PANK1	protein-coding	1.44286
ALPL	protein-coding	2.17759
RHOU	protein-coding	2.06707
RNF144B	protein-coding	1.44726
KCNK6	protein-coding	1.61906
FBXO32	protein-coding	2.26213
DTNA	protein-coding	1.78181
B4GALNT1	protein-coding	2.00211
MCAM	protein-coding	2.59538
F2RL2	protein-coding	-2.87592
FBXO43	protein-coding	-1.45649
ITGA10	protein-coding	3.06612
NDNF	protein-coding	-4.61614
MLC1	protein-coding	-2.7366
PELI1	protein-coding	1.18352
FAM71C	protein-coding	4.2984
TNFRSF21	protein-coding	1.36663
GREM2	protein-coding	-2.55402
C8orf34	protein-coding	2.74738
TUBB3	protein-coding	-1.1193
TNFRSF19	protein-coding	1.72192
KCNH1	protein-coding	-2.67726
PRICKLE1	protein-coding	-1.90805
PRICKLE2	protein-coding	1.00824
CDC25C	protein-coding	-1.15743
KCNG1	protein-coding	-1.81678
HUNK	protein-coding	1.16341
LINGO1	protein-coding	3.62033
LPL	protein-coding	4.82891
FAM110B	protein-coding	-2.11636
UBL4B	protein-coding	-3.87153
TBX15	protein-coding	2.58791
FANCD2	protein-coding	-1.12505
ZNF860	protein-coding	2.86544
TUBE1	protein-coding	-1.18688
PTGES	protein-coding	-1.52974
COQ2	protein-coding	-1.28216
CYP7B1	protein-coding	5.26772
KCNS3	protein-coding	1.9495
PRDM6	protein-coding	2.4764
LIMS2	protein-coding	1.22299
COMP	protein-coding	5.96136
MYBPHL	protein-coding	4.4504
SHISA2	protein-coding	-2.835
MAP3K6	protein-coding	1.06465
PTGDR	protein-coding	2.68647
FRZB	protein-coding	6.35473
GPRC5B	protein-coding	2.22801
GPRC5A	protein-coding	-3.60126
TGFB3	protein-coding	1.33126
CPM	protein-coding	5.23154
RRAS	protein-coding	1.05095
CPZ	protein-coding	-1.21869
PHGDH	protein-coding	-3.05835
RRAD	protein-coding	2.71344
ISYNA1	protein-coding	1.21889
STK32B	protein-coding	-1.1873
AKAP5	protein-coding	1.34607
AKAP6	protein-coding	2.1625
VEGFA	protein-coding	-1.15596
OSR1	protein-coding	-3.08851
KIAA1161	protein-coding	1.25401
FBLN2	protein-coding	1.45406
FBLN5	protein-coding	2.10563
CASC5	protein-coding	-1.1566
TGFBI	protein-coding	-1.83278
ARHGEF37	protein-coding	3.41388
RNASE4	protein-coding	1.14113
SAMD12	protein-coding	-2.51339
DIAPH2	protein-coding	1.40887
DLC1	protein-coding	-1.23462
ARHGEF25	protein-coding	1.53795
LRP1B	protein-coding	-3.04145
GPLD1	protein-coding	1.36948
SMN1	protein-coding	-1.28168
KLHL30	protein-coding	3.14065
CFB	protein-coding	1.75358
KLHL38	protein-coding	3.05447
ADAM29	protein-coding	4.12847
AJUBA	protein-coding	-1.13291
LEP	protein-coding	7.61229
CFH	protein-coding	3.20049
CFD	protein-coding	1.46238
OSTN	protein-coding	-20
COLQ	protein-coding	1.76319
SLC15A2	protein-coding	2.77233
AEBP1	protein-coding	1.26623
B3GNT5	protein-coding	1.43968
B3GNT2	protein-coding	1.2832
PTGIR	protein-coding	2.12847
SAPCD2	protein-coding	-2.64475
UGCG	protein-coding	-2.43009
CENPA	protein-coding	-1.3121
IGSF3	protein-coding	2.80655
CENPE	protein-coding	-1.11842
C1orf110	protein-coding	3.10248
CENPF	protein-coding	-1.67118
ADD3	protein-coding	-1.23983
COL11A1	protein-coding	3.79427
ARHGEF19	protein-coding	1.48063
COLEC12	protein-coding	-2.32083
CIT	protein-coding	-1.48916
SLC2A10	protein-coding	1.0137
SLC2A12	protein-coding	-1.99366
CEP55	protein-coding	-1.46151
CKB	protein-coding	2.28263
MAMLD1	protein-coding	-1.39309
NKAIN2	protein-coding	1.4619
SLC15A3	protein-coding	1.4366
NRBP2	protein-coding	1.04089
LIF	protein-coding	-3.35825
STAT5A	protein-coding	1.21904
AMACR	protein-coding	1.67644
LOC101927266	protein-coding	-1.63234
RGS20	protein-coding	-1.38172
RGS16	protein-coding	4.50351
EXT1	protein-coding	-1.22953
KCNJ15	protein-coding	3.93091
KLF17	protein-coding	3.58791
LAYN	protein-coding	1.013
PKD1L1	protein-coding	1.18591
DEPTOR	protein-coding	-1.97543
C1QTNF9B	protein-coding	2.85094
CCDC85B	protein-coding	-1.17586
NXPH3	protein-coding	4.28348
ATL1	protein-coding	1.0097
ANKFN1	protein-coding	-2.91441
COL3A1	protein-coding	2.49351
CNNM1	protein-coding	1.42441
DAB2	protein-coding	-1.09932
RGS2	protein-coding	1.53565
RGS9	protein-coding	2.32349
PTGR1	protein-coding	-1.14443
CNNM2	protein-coding	2.07671
CLDN1	protein-coding	1.54097
EFS	protein-coding	1.15144
SPRY4	protein-coding	1.57301
ARMC12	protein-coding	2.21594
SH3BGRL2	protein-coding	2.24395
SPRY2	protein-coding	-1.77628
SPRY1	protein-coding	2.18632
GMIP	protein-coding	1.04418
RAMP1	protein-coding	1.26228
ADM2	protein-coding	-2.02228
ANKRD55	protein-coding	-20
ADIRF	protein-coding	1.06541
NPAS2	protein-coding	1.36491
NPAS1	protein-coding	-1.40995
PTPRQ	protein-coding	1.17794
PTGS2	protein-coding	-1.42914
SLC5A3	protein-coding	1.0707
RGMB	protein-coding	-2.102
BFSP1	protein-coding	2.34892
ANKRD35	protein-coding	2.39151
LUM	protein-coding	1.12797
ADAP1	protein-coding	1.99354
MEF2C	protein-coding	1.0846
PDE8B	protein-coding	1.11048
GMPR	protein-coding	1.36249
LIPH	protein-coding	3.77233
PDE7B	protein-coding	-2.11332
PYGM	protein-coding	1.99097
GABRA4	protein-coding	2.76074
CDC42EP2	protein-coding	-1.90163
NEK10	protein-coding	-1.33422
AMOT	protein-coding	-1.11296
LXN	protein-coding	-1.30121
PDE6D	protein-coding	1.08103
IQSEC1	protein-coding	1.13344
KDELC1	protein-coding	1.08267
FAM213A	protein-coding	1.42126
FAM83D	protein-coding	-1.06367
PDE4D	protein-coding	-2.30348
FAM212B	protein-coding	-1.83208
GFRA1	protein-coding	-2.24703
EYA4	protein-coding	-1.09633
RGL1	protein-coding	-1.02919
RGL3	protein-coding	2.4504
CPXM2	protein-coding	1.07755
CASZ1	protein-coding	2.09531
LOC728392	protein-coding	-1.26307
TPRG1	protein-coding	1.69407
PDE1C	protein-coding	-2.94462
OLFML1	protein-coding	-2.13236
IFI44	protein-coding	3.65176
PMEPA1	protein-coding	1.86628
CNN1	protein-coding	2.13529
PER1	protein-coding	1.97836
PER3	protein-coding	-1.64656
PDCD1LG2	protein-coding	-1.73674
RAB39B	protein-coding	-20
IFI30	protein-coding	-1.17586
IFI35	protein-coding	2.10789
EPS8L2	protein-coding	1.03908
DPT	protein-coding	3.22801
DKK3	protein-coding	1.40512
ZFP36L1	protein-coding	1.08095
L1CAM	protein-coding	-3.48033
FBLIM1	protein-coding	1.02109
CACNA1H	protein-coding	3.02795
IFI27	protein-coding	5.84547
CACNA1B	protein-coding	3.35087
KIAA1211L	protein-coding	2.50699
GCSAM	protein-coding	2.86544
JPH2	protein-coding	1.68064
CACNB1	protein-coding	1.08875
CNR1	protein-coding	5.29036
UNC5D	protein-coding	-5.84307
UNC5B	protein-coding	-2.73226
CRYAB	protein-coding	2.32844
DSP	protein-coding	1.46757
EPGN	protein-coding	-1.66552
TNC	protein-coding	-1.5157
TRNP1	protein-coding	2.29233
KRT14	protein-coding	3.15401
ARHGEF2	protein-coding	-1.91556
MUC1	protein-coding	2.59386
ADAMTS19	protein-coding	2.15822
ZNF793	protein-coding	1.1791
ADAMTS15	protein-coding	-2.10209
MVK	protein-coding	1.09395
MX1	protein-coding	6.33224
MX2	protein-coding	3.77672
ADAMTS12	protein-coding	2.00842
ADAMTS10	protein-coding	1.6869
CDC20	protein-coding	-1.74706
CCDC3	protein-coding	3.27143
RAPGEF5	protein-coding	2.28498
CSMD2	protein-coding	3.15822
KIAA1024	protein-coding	1.26223
ZNF799	protein-coding	1.29512
GOLGA8N	protein-coding	1.35589
HEY1	protein-coding	3.50485
HEY2	protein-coding	1.81784
CORO2B	protein-coding	1.56361
FAM105A	protein-coding	3.52079
TK1	protein-coding	-1.36372
PLXNA2	protein-coding	2.4504
MGP	protein-coding	8.46252
AVPI1	protein-coding	-1.63597
TM4SF1	protein-coding	-3.64892
SH3RF2	protein-coding	-1.55803
PRKCH	protein-coding	1.25109
H2AFZ	protein-coding	-1.20154
DES	protein-coding	6.1397
FAM107B	protein-coding	-1.78385
TXNRD1	protein-coding	-2.48892
COL12A1	protein-coding	2.96126
TRIM16L	protein-coding	-1.98606
H2AFV	protein-coding	-1.05064
FAM107A	protein-coding	5.55474
IL12RB2	protein-coding	1.69407
HSPB8	protein-coding	2.08541
HSPB7	protein-coding	3.35301
HSPB6	protein-coding	1.64675
SOX13	protein-coding	1.34349
HSPB3	protein-coding	1.87793
NFKBIA	protein-coding	1.41328
HAPLN3	protein-coding	2.02407
RASGRP2	protein-coding	3.35419
HSPB1	protein-coding	1.11347
AXIN2	protein-coding	1.42468
H2AFJ	protein-coding	1.3696
GABRR2	protein-coding	2.58791
TEF	protein-coding	-1.29753
MSMO1	protein-coding	1.58661
SLC9A3R1	protein-coding	1.8946
SLC9A3R2	protein-coding	1.18762
PTPN3	protein-coding	1.01526
KRT7	protein-coding	2.11196
DMD	protein-coding	1.02819
CXCL6	protein-coding	20
CXCL5	protein-coding	3.4504
CXCL2	protein-coding	1.91275
CXCL3	protein-coding	4.03537
DCHS2	protein-coding	3.31001
CXCL1	protein-coding	5.29563
TES	protein-coding	1.07891
PLXND1	protein-coding	1.18453
C15orf54	protein-coding	1.83149
PLXNC1	protein-coding	-1.08358
AGTR1	protein-coding	-1.87153
LIN7A	protein-coding	1.5202
SLC16A8	protein-coding	4.77233
SLC16A6	protein-coding	-2.72163
PLXNB1	protein-coding	1.58049
MFAP4	protein-coding	2.4666
TNIP3	protein-coding	-2.27007
MFAP5	protein-coding	3.64037
MME	protein-coding	-2.00838

## Sheet: D14 vs D0
AccID	type_of_gene	Log2FC
LOC101927561	ncRNA	-3.54727
LOC101929375	ncRNA	4.43572
LOC101928411	ncRNA	-1.72011
LOC100131315	ncRNA	-2.55063
LOC101448202	ncRNA	-1.71077
TXNP6	ncRNA	-1.15823
RP11-527H14.3	ncRNA	-1.54352
LINC00603	ncRNA	20
SNHG8	ncRNA	-1.16757
LOC100133445	ncRNA	3.18162
LINC00260	ncRNA	-1.82832
ZEB2-AS1	ncRNA	-1.76027
LOC101927355	ncRNA	1.81905
LOC101927388	ncRNA	-2.16419
CYP51A1P3	ncRNA	-1.43577
LINC01003	ncRNA	1.83272
LOC100506737	ncRNA	3.28139
SPATA13-AS1	ncRNA	1.62487
SNHG5	ncRNA	-1.34708
STIP1P1	ncRNA	2.59665
LOC102724210	ncRNA	20
DOCK9-AS2	ncRNA	3.08208
LOC101928051	ncRNA	2.3902
LOC101929309	ncRNA	20
ACTA2-AS1	ncRNA	-1.87103
LOC102723972	ncRNA	20
TAPSAR1	ncRNA	1.22531
KCNJ2-AS1	ncRNA	3.66704
LOC102723797	ncRNA	-2.28385
LOC102723500	ncRNA	3.08208
LINC00310	ncRNA	1.7948
LOC284023	ncRNA	1.92775
HCP5	ncRNA	2.8834
GAS6-AS2	ncRNA	1.56197
SLIT2-IT1	ncRNA	-2.61141
COL18A1-AS2	ncRNA	-2.19218
FLJ23867	ncRNA	-1.7283
LOC101928860	ncRNA	-2.54727
MIR210HG	ncRNA	-4.54727
LOC101928875	ncRNA	20
LOC401463	ncRNA	20
LOC101928188	ncRNA	-2.29481
LOC101928419	ncRNA	-3.61141
LOC101928584	ncRNA	1.26579
LOC102723476	ncRNA	2.37159
MIR503HG	ncRNA	-3.8952
RP11-197N18.7	ncRNA	-1.73554
DIO3OS	ncRNA	2.09978
LOC102723356	ncRNA	2.92711
RGMB-AS1	ncRNA	-2.62597
LOC101927119	ncRNA	1.7948
LOC102724554	ncRNA	1.14156
LOC102723458	ncRNA	4.43572
LOC100126784	ncRNA	1.57836
LOC102723927	ncRNA	2.75346
RP11-15A1.7	ncRNA	1.22443
LINC00856	ncRNA	-2.72895
SNHG18	ncRNA	-1.2659
LOC148696	ncRNA	1.56321
KIRREL3-AS2	ncRNA	-2.12737
LINC00304	ncRNA	3.63462
RP5-833A20.1	ncRNA	3.28139
GRK5-IT1	ncRNA	-1.64424
LOC102724720	ncRNA	4.49712
LOC101926953	ncRNA	-4.08784
RPS6KA2-IT1	ncRNA	1.76226
RP11-540A21.2	ncRNA	1.43
LOC102724869	ncRNA	-1.95034
LOC100506621	ncRNA	-1.40052
LOC102724907	ncRNA	1.64151
LOC100506691	ncRNA	-2.8952
LINC00525	ncRNA	4.49712
LOC101928615	ncRNA	-1.13365
FLJ46906	ncRNA	1.23023
LOC101929500	ncRNA	-1.53428
SOCS2-AS1	ncRNA	-2.24704
HYMAI	ncRNA	-1.41799
LOC101928245	ncRNA	2.16008
SNHG4	ncRNA	-1.29352
LOC100129550	ncRNA	1.33988
LOC101928152	ncRNA	-1.62752
LOC102724124	ncRNA	-3.40977
C1orf220	ncRNA	-1.81113
VPS9D1-AS1	ncRNA	-1.7759
LINC00346	ncRNA	-1.58118
LOC101929079	ncRNA	20
RNF144A-AS1	ncRNA	2.97105
RP11-540D4.3	ncRNA	20
LOC102723696	ncRNA	-2.05983
CTD-2201E9.1	ncRNA	-2.60442
LOC102723543	ncRNA	-1.51234
LOC102724190	ncRNA	20
LOC102724854	ncRNA	-1.627
LINC00398	ncRNA	3.99962
SNHG16	ncRNA	-1.09115
PLCE1-AS1	ncRNA	1.46344
LOC100505504	ncRNA	-2.15823
C5orf27	ncRNA	3.99962
DNM3OS	ncRNA	-1.06476
LINC01116	ncRNA	-20
LOC101927002	ncRNA	2.01169
FLJ31104	ncRNA	2.49712
DIAPH3-AS2	ncRNA	-2.8952
LINC00943	ncRNA	4.08208
LOC102724566	ncRNA	-1.99473
KRT87P	ncRNA	1.38141
LOC101926887	ncRNA	2.79048
LOC101927181	ncRNA	1.8639
LOC101926980	ncRNA	-1.43156
RP3-510O8.4	ncRNA	3.29067
NLGN4Y-AS1	ncRNA	-3.14674
LOC102724584	ncRNA	1.33323
LINC00202-1	ncRNA	20
CTB-113P19.1	ncRNA	-1.71903
LOC102723510	ncRNA	-3.31024
LOC102723905	ncRNA	-2.36448
LOC102724363	ncRNA	3.37159
DIAPH3-AS1	ncRNA	-2.82481
RP11-665G4.1	ncRNA	-1.74943
CTC-558O2.1	ncRNA	-1.67281
LOC284561	ncRNA	1.86009
LINC00595	ncRNA	-2.0472
LOC101928916	ncRNA	20
RP11-397C18.2	ncRNA	-1.7759
LOC101928214	ncRNA	-1.6979
LOC101927283	ncRNA	-1.334
CERS6-AS1	ncRNA	1.66839
LOC101929092	ncRNA	-2.08784
LOC102723834	ncRNA	1.79301
LOC100506175	ncRNA	3.11379
CACNA1C-AS1	ncRNA	-1.46224
LOC101928011	ncRNA	2.16008
RP11-713M15.1	ncRNA	-2.17788
LOC101929151	ncRNA	-1.72148
LOC101928185	ncRNA	-2.5208
RP11-379B18.5	ncRNA	-1.86984
RP11-175K6.1	ncRNA	1.58201
LINC01133	ncRNA	-1.47199
LINC00475	ncRNA	20
PAXIP1-AS2	ncRNA	1.16591
LOC101929385	ncRNA	1.52782
LOC101927585	ncRNA	-2.52842
AC007099.1	ncRNA	-2.19514
LOC101928281	ncRNA	-1.86682
LOC100506714	ncRNA	1.16591
RP11-909M7.3	ncRNA	-1.16072
LINC01137	ncRNA	2.32244
LOC101928173	ncRNA	-1.63804
LINC00663	ncRNA	1.81398
LOC101928351	ncRNA	-2.62974
PRC1-AS1	ncRNA	-1.18342
LOC102724281	ncRNA	1.84414
RP11-807H7.1	ncRNA	-2.58534
AL132709.5	ncRNA	-1.18715
LOC102724120	ncRNA	20
LINC01021	ncRNA	6.0619
LOC100288181	ncRNA	-1.93827
CTB-174D11.1	ncRNA	-2.02371
AFAP1-AS1	ncRNA	-2.09131
MIR143HG	ncRNA	-1.17134
LINC00548	ncRNA	20
GAS6-AS1	ncRNA	1.4837
LINC00704	ncRNA	20
LOC286189	ncRNA	2.91216
LINC01085	ncRNA	-3.18492
SRP14-AS1	ncRNA	2.30905
LOC100507156	ncRNA	-2.4501
LINC00598	ncRNA	20
LOC100128006	ncRNA	-2.99129
WEE2-AS1	ncRNA	20
AC005358.3	ncRNA	-3.99473
LOC100133669	ncRNA	2.64396
RP11-317M11.1	ncRNA	4.6126
LOC102723733	ncRNA	-2.61141
RP11-356I2.4	ncRNA	2.34956
LOC101928609	ncRNA	2.91216
RP11-276H19.1	ncRNA	2.33469
LOC101930026	ncRNA	-1.82481
RP11-761I4.3	ncRNA	-2.61141
RP11-22H5.2	ncRNA	-1.56177
RP11-475O6.1	ncRNA	2.71951
LOC100294362	ncRNA	1.36062
LINC00152	ncRNA	-1.35158
LOC100507420	ncRNA	-2.5208
RP11-506B6.6	ncRNA	-2.13224
RP11-182I10.3	ncRNA	2.2084
OVCH1-AS1	ncRNA	2.86635
LOC102724550	ncRNA	7.79174
LOC102724947	ncRNA	-1.80019
SLC7A11-AS1	ncRNA	-2.18983
KCNQ1OT1	ncRNA	-1.12687
LINC00278	ncRNA	2.49712
NREP-AS1	ncRNA	-3.6239
ZMIZ1-AS1	ncRNA	2.12939
MIR4435-1HG	ncRNA	-1.40629
LINC01060	ncRNA	-4.16184
LINC00673	ncRNA	-2.02073
BDNF-AS	ncRNA	-2.04685
RP11-696N14.1	ncRNA	1.42673
STARD4-AS1	ncRNA	-2.9419
LINC00607	ncRNA	1.42786
LOC100505498	ncRNA	-1.51715
LOC102724420	ncRNA	2.95655
LINC01182	ncRNA	-1.98596
LINC00922	ncRNA	2.85076
LINC01088	ncRNA	3.49712
SLC8A1-AS1	ncRNA	-2.6239
TEX41	ncRNA	-1.16237
